# Supplementary material for: Estimation of long memory in volatility using wavelets
Source: publisher site journal article supplement (doi:10.1515/snde-2016-0101), 2017-04-06
Supplement: Supplementary file 1 [file Paper_online_app_final_old.pdf › snde-2016-0101_suppl/Paper_online_app_final_old.pdf]

This document presents supplementary results and illustrations for the paper “Estimation of long memory in volatility using wavelets”, which were, due to their extent, omitted in the printed version.

# 1 FIEGARCH transformation

As discussed in Perez and Zaffaroni (2008) and Zaffaroni (2009), to estimate the FIEGARCH model using FWE, it is necessary to rewrite the model in a signal plus noise form, for which the spectral density can be derived. Let's begin with the original FIEGARCH(1,d,2) model:

$$\varepsilon_t = z_t h_t^{1/2} \quad (1)$$

$$\ln(h_t) = \omega + \Phi(L)g(z_{t-1}) \quad (2)$$

$$g(z_t) = \theta z_t + \gamma[|z_t| - E(|z_t|)] \quad (3)$$

$$\Phi(L) = (1-L)^{-d}[1 + \alpha_{[2]}(L)][\beta(L)]^{-1} \quad (4)$$

where for FIEGARCH(1,d,2)  $\alpha_{[2]}(L) = \alpha L$ ,  $\beta(L) = 1 - \beta L$ . Following Zaffaroni (2009), this can be rewritten as

$$\varepsilon_t^2 = z_t^2 h_t \quad (5)$$

$$\ln(\varepsilon_t^2) = \ln(z_t^2) + \ln(h_t) \quad (6)$$

$$\ln(h_t) = \omega + \Phi(L)g(z_{t-1}) \quad (7)$$

$$\Phi(L)g(z_{t-1}) = \sum_{s=0}^{\infty} \Phi_s g(z_{t-s-1}) \quad (8)$$

$$g(z_t) = \theta z_t + \gamma[|z_t| - E(|z_t|)], \quad (9)$$

which leads to

$$\ln(\varepsilon_t^2) = \ln(z_t^2) + \omega + \sum_{s=0}^{\infty} \Phi_s g(z_{t-s-1}) \quad (10)$$

$$g(z_t) = \theta z_t + \gamma[|z_t| - E(|z_t|)] \quad (11)$$

$$\Phi(L) = (1-L)^{-d}[1 + \alpha L][1 - \beta L]^{-1}. \quad (12)$$

From Perez and Zaffaroni (2008), the spectral density of this process for  $z_t \sim N(0, 1)$ ,  $\omega = 0$  and simple Fourier frequencies  $\lambda_j = j/T$ ;  $\lambda_j \in \langle -1/2, 1/2 \rangle$  is

$$\begin{aligned} f(\lambda_j, v) &= \frac{A(\xi)}{2\pi} + \frac{B(v)}{2\pi} \left| \sum_{s=0}^{\infty} \Phi_s(\zeta) e^{2\pi i s \lambda_j} \right|^2 + \\ &+ \frac{C(v)}{2\pi} \left( e^{2\pi i \lambda_j} \sum_{s=0}^{\infty} \Phi_s(\zeta) e^{2\pi i s \lambda_j} \right) + \\ &+ \frac{C(v)}{2\pi} \left( e^{-2\pi i \lambda_j} \sum_{s=0}^{\infty} \Phi_s(\zeta) e^{-2\pi i s \lambda_j} \right) \end{aligned} \quad (13)$$

where  $A(\xi) = \text{var}(\ln(z_0^2))$ ,  $B(v) = \text{var}(g(z_0))$ ,  $C(v) = \text{cov}(\ln(z_0^2), g(z_0))$ ,  $v = (\xi', \zeta')'$ , and  $\xi$  is the vector of parameters in the distribution function of variable  $z$ . For  $z_t \sim N(0, 1)$ :

$$A(\xi) = \Psi\left(\frac{1}{2}\right) \quad (14)$$

$$B(v) = \theta_2 + \delta^2(1 - \mu_{|z|}^2) \quad (15)$$

$$C(v) = \delta\mu_z(\psi(1) - \psi(\frac{1}{2})) \quad (16)$$

$$\mu_{|z|} = E(|z|) = \sqrt{\frac{2}{\pi}}, \quad (17)$$

where  $\psi(x)$  and  $\Psi(x)$  are digamma and trigamma functions respectively. Evaluated at Fourier frequencies, this spectral density occurs in both terms of the FWE objective function. For a generalization to  $z_t$  following GED or Student-t distribution, see Perez and Zaffaroni (2008).

## 2 Discrete wavelet transform

The core of a wavelet transform is a wavelet system, whose construction, together with means of the projection applied, determine the characteristics of the transformed data. For any  $s \in \mathbb{R}$ , a basic wavelet system can be defined as a set  $\{\{\varphi_{j_0,k}(s)\}, \{\psi_{j,k}(s)\}; k \in \mathbb{Z}, j \in \mathbb{Z}\}$ , creating an orthonormal basis in  $L^2(\mathbb{R})$ ; which means that any function  $f \in L^2(\mathbb{R})$  can be expressed as

$$f(s) = \sum_k \alpha_{j_0,k} \varphi_{j_0,k}(s) + \sum_{j=-\infty}^{j_0} \sum_k \beta_{j,k} \psi_{j,k}(s), \quad (18)$$

where  $\alpha_k = \int f(s) \overline{\varphi_{j_0,k}(s)} ds$ , and  $\beta_{j,k} = \int f(s) \overline{\psi_{j,k}(s)} ds$ , where the elements  $\alpha_k$ ,  $\beta_{j,k}$ ,  $\varphi(s)$  and  $\psi(s)$  are called scaling coefficients, detail (wavelet) coefficients, scaling function (father wavelet) and wavelet function (mother wavelet) respectively, and the translated and dilated transformations of the mother wavelet are called daughter wavelets. With increasing  $j$ , these daughter wavelets get wider, with  $j \leq 0$  they are narrower than the mother wavelet.

The basic conditions for  $\psi(s)$  to be a valid mother wavelet are that  $\int \psi(s) ds = 0$  and  $\int \psi^2(s) ds = 1$ , while the usual requirement is also the “admissibility” condition  $\int \frac{|\hat{\psi}(\omega)|^2}{\omega} d\omega < \infty$ , where  $\hat{\psi}$  is the Fourier transform of  $\psi$ . This condition ensures that we can reconstruct the original time series from its transform. For

complete conditions on  $\varphi(s)$ ,  $\psi(s)$  to be valid father and mother wavelets in the context various subsets of  $L^2(\mathbb{R})$  and for other details concerning construction of wavelet systems see Hardle, Kerkyacharian, Tsybakov, and Picard (1998). In addition, we provide examples in online appendix.

Next, any method that decomposes original data using the wavelet system and expresses them in terms of coefficients  $\{\alpha_k, \beta_{j,k}\}$  and functions  $\{\varphi(s), \psi(s)\}$  defined above, is a wavelet transform. In case of  $j \in \mathbb{Z}$ , as applied in our work, we speak about a discrete wavelet transform (DWT), while for  $j \in \mathbb{R}$  the transform is continuous (CWT). By tradition, the default choice of scales is  $\{2^{1-j}; j \in \mathbb{Z}\}$ , thus the standard DWT can be defined in terms of the wavelet expansion (Eq. 18) with scaling defined as  $s(j) = 2^{1-j}$  (i.e. “scale  $j$ ” refers to the scaling  $2^{1-j}$ , scale 1 refers to  $2^0 = 1$ ). The DWT coefficients are obtained for scales  $j_0 = J$ ,  $j_0 - 1 = J - 1$ ,  $j_0 - 2 = J - 2, \dots$ ,  $j_0 - (j_0 - 1) = 1$  using two-channel filter banks and down-sampling, so that at each level of decomposition  $j$  of a series of length  $M$  we get  $M/2^j$  DWT coefficients, see e.g. Jensen (2000). These coefficients can be in turn used for decomposition of the variance  $\sigma^2$  of the process  $x_t$ :

$$\sigma^2 = E(x_t^2) - [E(x_t)]^2 = \frac{\|x_t\|^2}{T} - [E(x_t)]^2 = \frac{\sum_{j=1}^J \|W_j\|^2 + \|V_J\|^2}{T} - [E(x_t)]^2, \quad (19)$$

where  $W_j$ ;  $j = 1, \dots, J$  and  $V_J$  are vectors of wavelet and scaling coefficients respectively and the  $[E(x_t)]^2$  can be estimated using the squared sample mean  $\bar{x}_t^2$ , or using the true squared mean whenever known. The spectral density  $f(\lambda, \zeta)$  of  $x_t$  can be estimated using the relationship:

$$\frac{\|W_j\|^2}{T} = \frac{\sigma_{W,j}^2}{2^j} \approx 2 \int_{1/2^{j+1}}^{1/2^j} f(\lambda, \zeta) d\lambda \quad (20)$$

$$\frac{\|V_J\|^2}{T} - \bar{x}_t^2 = \frac{\sigma_{V,J}^2}{2^J} - \left(1 - \frac{1}{2^J}\right) \bar{x}_t^2 \approx 2 \int_0^{1/2^{J+1}} f(\lambda, \zeta) d\lambda, \quad (21)$$

where  $\sigma_{W,j}^2$  and  $\sigma_{V,J}^2$  are the sample variances of the wavelet and scaling coefficients respectively for  $j = 1, 2, \dots, J$ .

## References

- Hardle, W., G. Kerkyacharian, A. B. Tsybakov, and D. Picard (1998): *Wavelets, Approximation and Statistical Applications*, John Wiley & Sons, Incorporated.
- Jensen, M. J. (2000): “An alternative maximum likelihood estimator of long-memory processes using compactly supported wavelets,” *Journal of Economic Dynamics and Control*, 24, 361 – 387, URL <http://www.sciencedirect.com/science/article/pii/S016518899900010X>.

- Perez, A. and P. Zaffaroni (2008): “Finite-sample properties of maximum likelihood and whittle estimators in egarch and fiegarch models,” *Quantitative and Qualitative Analysis in Social Sciences*, 2, 78–97.
- Zaffaroni, P. (2009): “Whittle estimation of egarch and other exponential volatility models,” *Journal of Econometrics*, 151, 190–200, URL <http://ideas.repec.org/a/eee/econom/v151y2009i2p190-200.html>.

### **3 Spectral density estimation II**

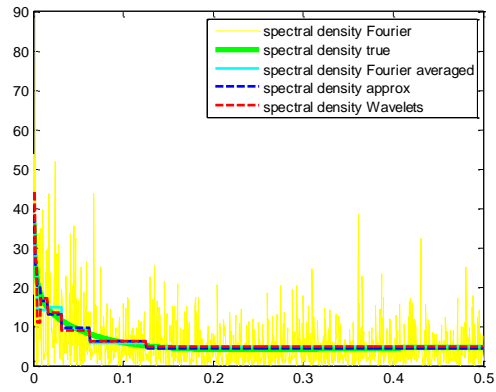

(a)  $T=2048$  ( $2^{11}$ ), level=10

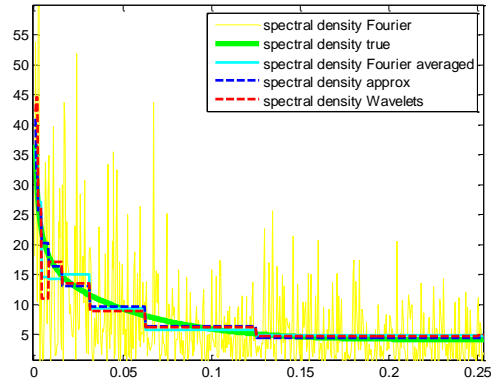

(b)  $T=2048$  ( $2^{11}$ ), level=10, zoom

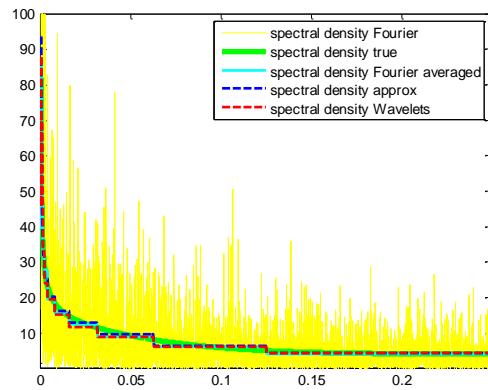

(c)  $T=16384$  ( $2^{14}$ ), level=13, zoom

Figure 1: Spectral density estimation ( $d=0.25$ )

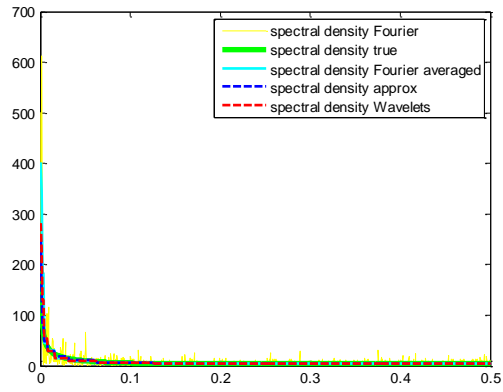

(a)  $T=2048$  ( $2^{11}$ ), level=10

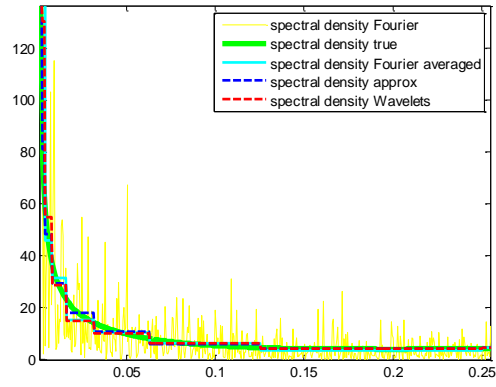

(b)  $T=2048$  ( $2^{11}$ ), level=10, zoom

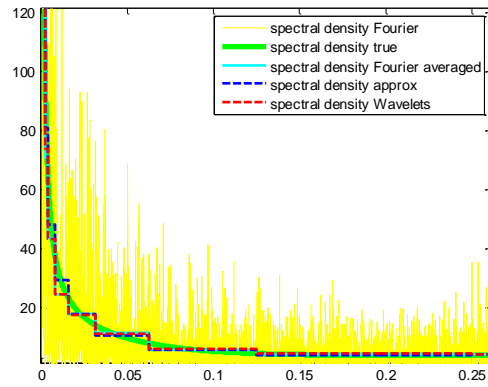

(c)  $T=16384$  ( $2^{14}$ ), level=13, zoom

Figure 2: Spectral density estimation ( $d=0.45$ )

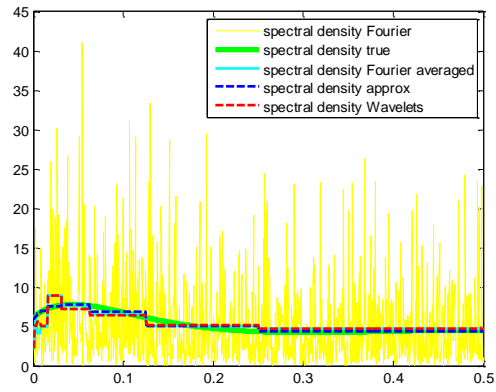

(a)  $T=2048$  ( $2^{11}$ ), level=10

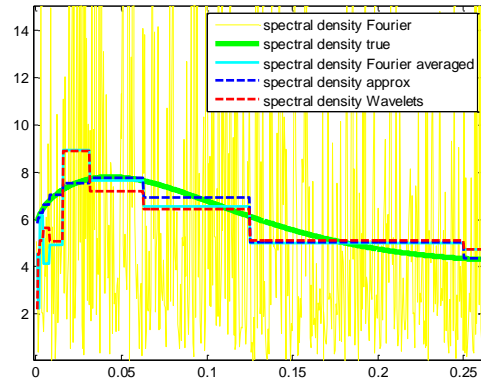

(b)  $T=2048$  ( $2^{11}$ ), level=10, zoom

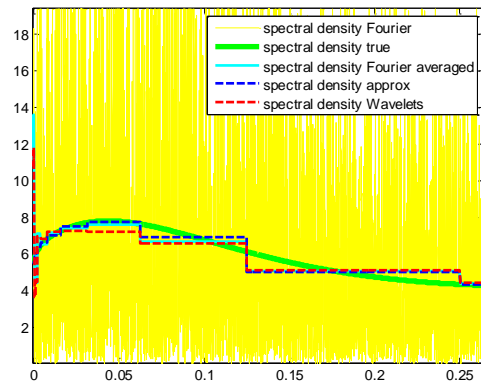

(c)  $T=16384$  ( $2^{14}$ ), level=13, zoom

Figure 3: Spectral density estimation ( $d=-0.25$ )



## 4 Wavelets and Wavelet coefficients analysis

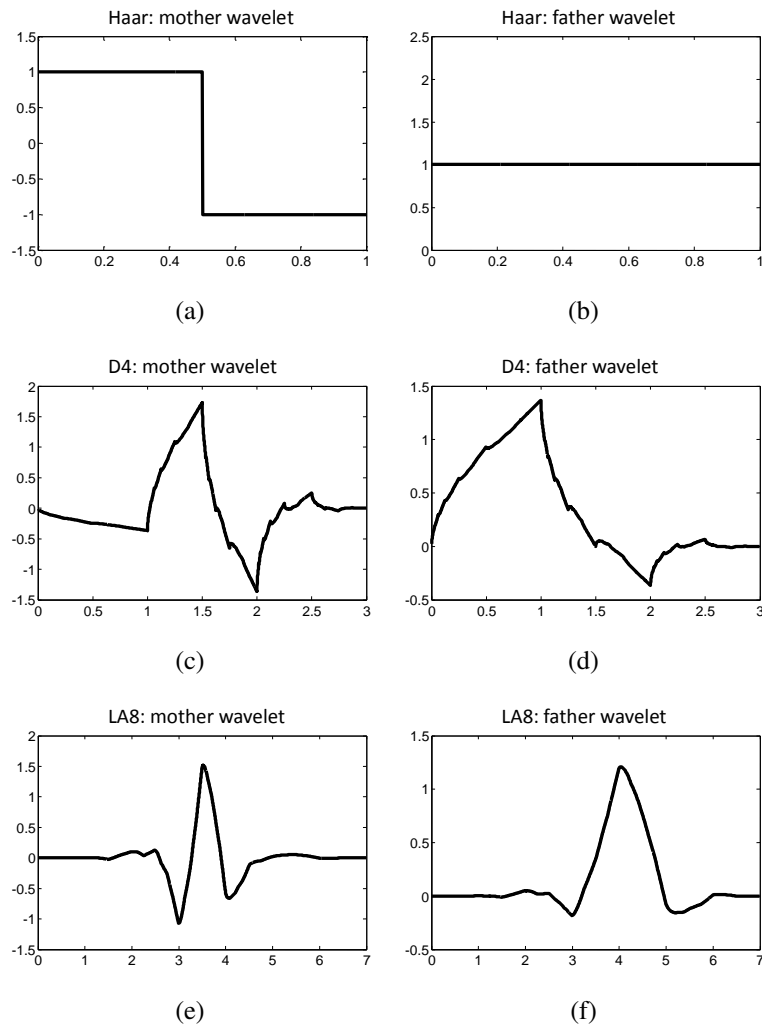

Figure 4: Wavelets: Haar, D4, LA8

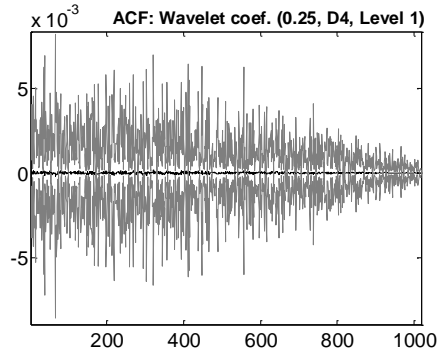

(a)

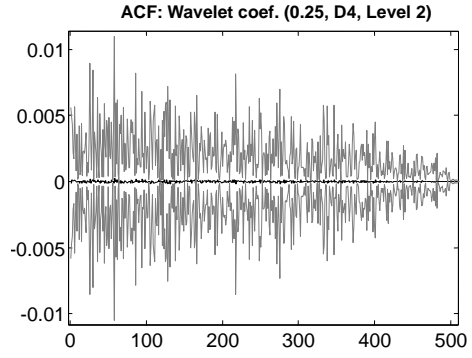

(b)

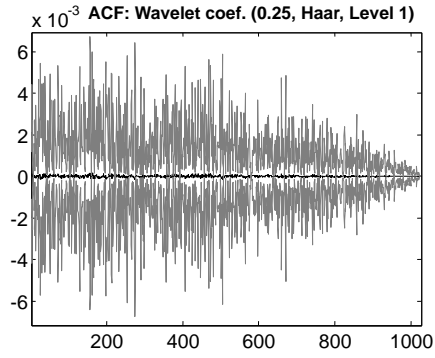

(c)

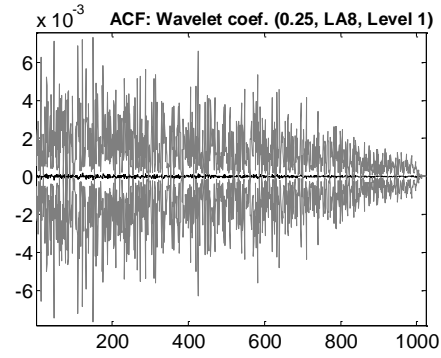

(d)

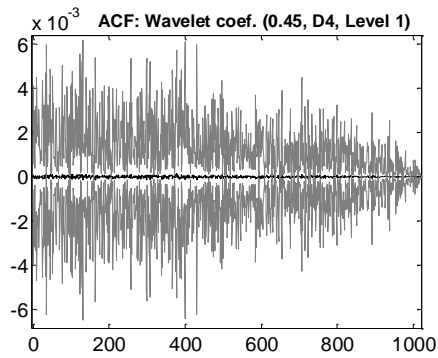

(e)

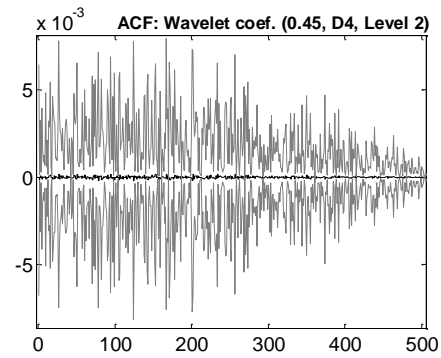

(f)

Figure 5: Estimates of autocorrelation functions (ACFs) of wavelet coefficients respective to FIEGARCH processes for  $T = 2^{11}$ ;  $d = 0.25$ ,  $d = 0.45$  and filters Haar, D4 and LA8; both sample mean and 95% confidence intervals based on 500 FIEGARCH simulations are provided for each lag available.

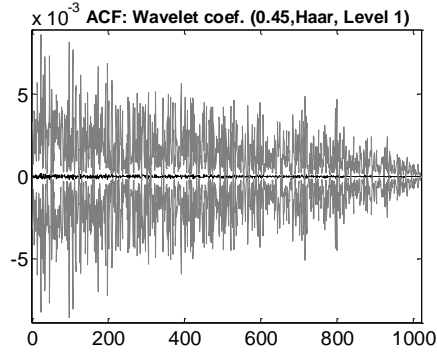

(a)

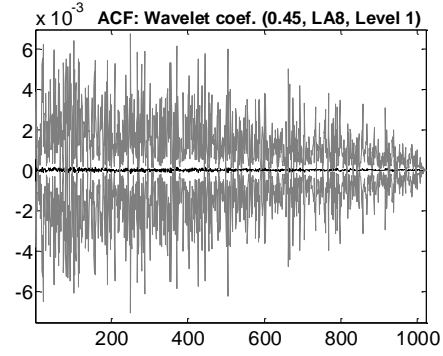

(b)

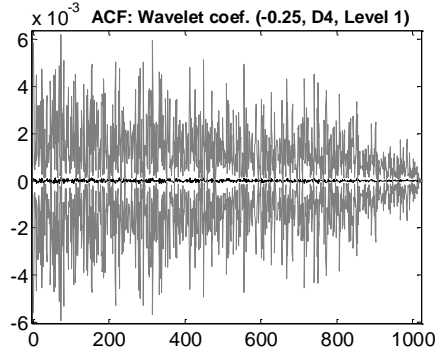

(c)

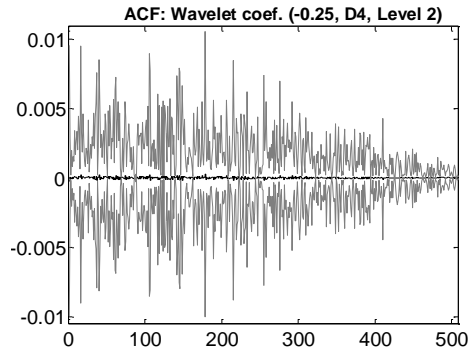

(d)

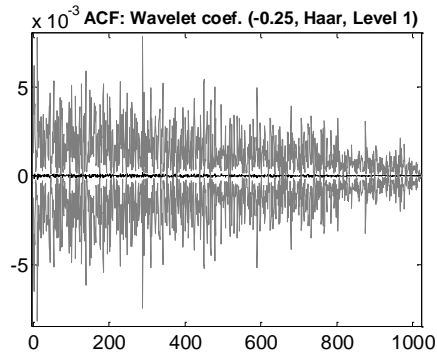

(e)

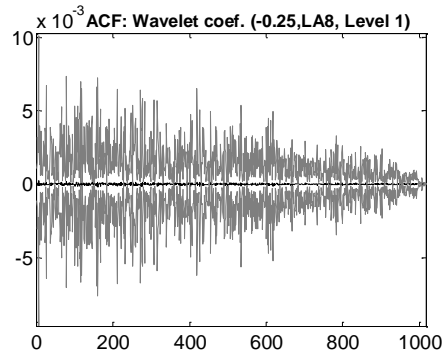

(f)

Figure 6: Estimates of autocorrelation functions (ACFs) of wavelet coefficients respective to FIEGARCH processes for  $T = 2^{11}$ ;  $d = 0.45$ ,  $d = -0.25$  and filters Haar, D4 and LA8; both sample mean and 95% confidence intervals based on 500 FIEGARCH simulations are provided for each lag available.

## 5 Results: Maximal Decomposition

Simulation:

- FIEGARCH(1,d,2)
- Truncation of infinite ARCH representation at lag = 1000
- Discarding first 1000 simulated numbers
- Number of simulations after truncation = 1000
- Sample lengths:  $2^9, 2^{10}, 2^{11}, 2^{12}, 2^{13}, 2^{14}$
- Parameters:  $(\omega_1, \alpha_1, \alpha_2, \beta_1, \theta, \gamma) = (0, 1, 0.5, 0.5, -0.3, 0.5)$ ,  $d = 0.25, 0.45, -0.25$
- Estimators: MLE, FWE, WWE(Haar), WWE(D4), WWE(LA8)
- Levels of decomposition: Maximal (depending on filter support)

| PAR              | TRUE     | METHOD    | N=2 <sup>9</sup> (512) |        |       |  | N=2 <sup>10</sup> (1024) |        |       |  | N=2 <sup>11</sup> (2048) |        |       |  |
|------------------|----------|-----------|------------------------|--------|-------|--|--------------------------|--------|-------|--|--------------------------|--------|-------|--|
|                  |          |           | MEAN                   | BIAS   | RMSE  |  | MEAN                     | BIAS   | RMSE  |  | MEAN                     | BIAS   | RMSE  |  |
| $\hat{d}$        | 0.250    | WWE1      | 0.109                  | -0.141 | 0.309 |  | 0.146                    | -0.104 | 0.270 |  | 0.202                    | -0.048 | 0.183 |  |
|                  |          | WWE2      | 0.132                  | -0.118 | 0.309 |  | 0.138                    | -0.112 | 0.287 |  | 0.171                    | -0.079 | 0.232 |  |
|                  |          | WWE3      | 0.176                  | -0.074 | 0.306 |  | 0.135                    | -0.115 | 0.298 |  | 0.145                    | -0.105 | 0.263 |  |
|                  |          | FWE       | 0.127                  | -0.123 | 0.284 |  | 0.172                    | -0.078 | 0.224 |  | 0.215                    | -0.035 | 0.147 |  |
|                  |          | MLE       | 0.174                  | -0.076 | 0.183 |  | 0.221                    | -0.029 | 0.111 |  | 0.232                    | -0.018 | 0.081 |  |
| $\hat{\omega}$   | 0.000    | ALL       | -                      | -      | -     |  | -                        | -      | -     |  | -                        | -      | -     |  |
| $\hat{\alpha}_2$ | 0.500    | WWE1      | 0.393                  | -0.107 | 0.557 |  | 0.419                    | -0.081 | 0.522 |  | 0.406                    | -0.094 | 0.504 |  |
|                  |          | WWE2      | 0.434                  | -0.066 | 0.580 |  | 0.502                    | 0.002  | 0.499 |  | 0.500                    | -0.000 | 0.475 |  |
|                  |          | WWE3      | 0.439                  | -0.061 | 0.584 |  | 0.531                    | 0.031  | 0.508 |  | 0.572                    | 0.072  | 0.426 |  |
|                  |          | FWE       | 0.570                  | 0.070  | 0.460 |  | 0.611                    | 0.111  | 0.402 |  | 0.592                    | 0.092  | 0.348 |  |
|                  |          | MLE       | 0.536                  | 0.036  | 0.244 |  | 0.529                    | 0.029  | 0.174 |  | 0.516                    | 0.016  | 0.123 |  |
| $\hat{\beta}_1$  | 0.500    | WWE1      | 0.542                  | 0.042  | 0.392 |  | 0.529                    | 0.029  | 0.347 |  | 0.509                    | 0.009  | 0.285 |  |
|                  |          | WWE2      | 0.548                  | 0.048  | 0.371 |  | 0.532                    | 0.032  | 0.329 |  | 0.530                    | 0.030  | 0.288 |  |
|                  |          | WWE3      | 0.526                  | 0.026  | 0.377 |  | 0.553                    | 0.053  | 0.313 |  | 0.539                    | 0.039  | 0.278 |  |
|                  |          | FWE       | 0.523                  | 0.023  | 0.347 |  | 0.512                    | 0.012  | 0.277 |  | 0.501                    | 0.001  | 0.203 |  |
|                  |          | MLE       | 0.549                  | 0.049  | 0.205 |  | 0.516                    | 0.016  | 0.139 |  | 0.515                    | 0.015  | 0.097 |  |
| $\hat{\theta}$   | -0.300   | WWE1      | -0.319                 | -0.019 | 0.318 |  | -0.310                   | -0.010 | 0.250 |  | -0.332                   | -0.032 | 0.197 |  |
|                  |          | WWE2      | -0.272                 | 0.028  | 0.305 |  | -0.260                   | 0.040  | 0.245 |  | -0.278                   | 0.022  | 0.195 |  |
|                  |          | WWE3      | -0.256                 | 0.044  | 0.307 |  | -0.240                   | 0.060  | 0.236 |  | -0.252                   | 0.048  | 0.194 |  |
|                  |          | FWE       | -0.258                 | 0.042  | 0.289 |  | -0.224                   | 0.076  | 0.221 |  | -0.237                   | 0.063  | 0.178 |  |
|                  |          | MLE       | -0.308                 | -0.008 | 0.054 |  | -0.302                   | -0.002 | 0.037 |  | -0.300                   | -0.000 | 0.026 |  |
| $\hat{\gamma}$   | 0.500    | WWE1      | 0.463                  | -0.037 | 0.354 |  | 0.467                    | -0.033 | 0.259 |  | 0.458                    | -0.042 | 0.209 |  |
|                  |          | WWE2      | 0.521                  | 0.021  | 0.357 |  | 0.515                    | 0.015  | 0.246 |  | 0.496                    | -0.004 | 0.191 |  |
|                  |          | WWE3      | 0.526                  | 0.026  | 0.363 |  | 0.512                    | 0.012  | 0.240 |  | 0.499                    | -0.001 | 0.180 |  |
|                  |          | FWE       | 0.490                  | -0.010 | 0.301 |  | 0.502                    | 0.002  | 0.214 |  | 0.498                    | -0.002 | 0.172 |  |
|                  |          | MLE       | 0.499                  | -0.001 | 0.088 |  | 0.500                    | 0.000  | 0.063 |  | 0.501                    | 0.001  | 0.044 |  |
| WWE1(Haar)       | WWE2(D4) | WWE3(LA8) |                        |        |       |  |                          |        |       |  |                          |        |       |  |

Table 1: Monte Carlo 1a: d=0.25; MLE, FWE, Haar, D4, LA8

| PARAM            | TRUE     | METHOD    | N=2 <sup>12</sup> (4096) |        |       |  | N=2 <sup>13</sup> (8192) |        |       |  | N=2 <sup>14</sup> (16384) |        |       |  |
|------------------|----------|-----------|--------------------------|--------|-------|--|--------------------------|--------|-------|--|---------------------------|--------|-------|--|
|                  |          |           | MEAN                     | BIAS   | RMSE  |  | MEAN                     | BIAS   | RMSE  |  | MEAN                      | BIAS   | RMSE  |  |
| $\hat{d}$        | 0.250    | WWE1      | 0.242                    | -0.008 | 0.103 |  | 0.252                    | 0.002  | 0.058 |  | 0.257                     | 0.007  | 0.041 |  |
|                  |          | WWE2      | 0.216                    | -0.034 | 0.148 |  | 0.244                    | -0.006 | 0.070 |  | 0.255                     | 0.005  | 0.044 |  |
|                  |          | WWE3      | 0.199                    | -0.051 | 0.186 |  | 0.237                    | -0.013 | 0.083 |  | 0.250                     | -0.000 | 0.047 |  |
|                  |          | FWE       | 0.240                    | -0.010 | 0.086 |  | 0.248                    | -0.002 | 0.049 |  | 0.251                     | 0.001  | 0.035 |  |
|                  |          | MLE       | 0.244                    | -0.006 | 0.041 |  | -                        | -      | -     |  | -                         | -      | -     |  |
| $\hat{\omega}$   | 0.000    | ALL       | -                        | -      | -     |  | -                        | -      | -     |  | -                         | -      | -     |  |
| $\hat{\alpha}_2$ | 0.500    | WWE1      | 0.350                    | -0.150 | 0.466 |  | 0.278                    | -0.222 | 0.411 |  | 0.240                     | -0.260 | 0.358 |  |
|                  |          | WWE2      | 0.444                    | -0.056 | 0.411 |  | 0.392                    | -0.108 | 0.356 |  | 0.358                     | -0.142 | 0.291 |  |
|                  |          | WWE3      | 0.534                    | 0.034  | 0.366 |  | 0.462                    | -0.038 | 0.296 |  | 0.441                     | -0.059 | 0.241 |  |
|                  |          | FWE       | 0.559                    | 0.059  | 0.288 |  | 0.533                    | 0.033  | 0.230 |  | 0.519                     | 0.019  | 0.165 |  |
|                  |          | MLE       | 0.503                    | 0.003  | 0.086 |  | -                        | -      | -     |  | -                         | -      | -     |  |
| $\hat{\beta}_1$  | 0.500    | WWE1      | 0.495                    | -0.005 | 0.226 |  | 0.512                    | 0.012  | 0.161 |  | 0.518                     | 0.018  | 0.110 |  |
|                  |          | WWE2      | 0.522                    | 0.022  | 0.212 |  | 0.517                    | 0.017  | 0.147 |  | 0.516                     | 0.016  | 0.103 |  |
|                  |          | WWE3      | 0.509                    | 0.009  | 0.234 |  | 0.513                    | 0.013  | 0.146 |  | 0.507                     | 0.007  | 0.104 |  |
|                  |          | FWE       | 0.495                    | -0.005 | 0.136 |  | 0.497                    | -0.003 | 0.094 |  | 0.496                     | -0.004 | 0.066 |  |
|                  |          | MLE       | 0.505                    | 0.005  | 0.058 |  | -                        | -      | -     |  | -                         | -      | -     |  |
| $\hat{\theta}$   | -0.300   | WWE1      | -0.348                   | -0.048 | 0.165 |  | -0.384                   | -0.084 | 0.130 |  | -0.396                    | -0.096 | 0.118 |  |
|                  |          | WWE2      | -0.286                   | 0.014  | 0.158 |  | -0.321                   | -0.021 | 0.108 |  | -0.334                    | -0.034 | 0.079 |  |
|                  |          | WWE3      | -0.260                   | 0.040  | 0.157 |  | -0.292                   | 0.008  | 0.107 |  | -0.305                    | -0.005 | 0.073 |  |
|                  |          | FWE       | -0.242                   | 0.058  | 0.152 |  | -0.268                   | 0.032  | 0.105 |  | -0.279                    | 0.021  | 0.074 |  |
|                  |          | MLE       | -0.301                   | -0.001 | 0.018 |  | -                        | -      | -     |  | -                         | -      | -     |  |
| $\hat{\gamma}$   | 0.500    | WWE1      | 0.460                    | -0.040 | 0.160 |  | 0.455                    | -0.045 | 0.123 |  | 0.454                     | -0.046 | 0.098 |  |
|                  |          | WWE2      | 0.496                    | -0.004 | 0.158 |  | 0.491                    | -0.009 | 0.118 |  | 0.490                     | -0.010 | 0.091 |  |
|                  |          | WWE3      | 0.502                    | 0.002  | 0.148 |  | 0.500                    | -0.000 | 0.112 |  | 0.500                     | 0.000  | 0.086 |  |
|                  |          | FWE       | 0.503                    | 0.003  | 0.139 |  | 0.502                    | 0.002  | 0.107 |  | 0.504                     | 0.004  | 0.082 |  |
|                  |          | MLE       | 0.501                    | 0.001  | 0.029 |  | -                        | -      | -     |  | -                         | -      | -     |  |
| WWE1(Haar)       | WWE2(D4) | WWE3(LA8) |                          |        |       |  |                          |        |       |  |                           |        |       |  |

Table 2: Monte Carlo 1b: d=0.25; MLE, FWE, Haar, D4, LA8

| PARAM            | TRUE     | METHOD    | N=2 <sup>9</sup> (512) |        |       |  | N=2 <sup>10</sup> (1024) |        |       |  | N=2 <sup>11</sup> (2048) |        |       |  |
|------------------|----------|-----------|------------------------|--------|-------|--|--------------------------|--------|-------|--|--------------------------|--------|-------|--|
|                  |          |           | MEAN                   | BIAS   | RMSE  |  | MEAN                     | BIAS   | RMSE  |  | MEAN                     | BIAS   | RMSE  |  |
| $\hat{d}$        | 0.450    | WWE1      | 0.272                  | -0.178 | 0.301 |  | 0.343                    | -0.107 | 0.225 |  | 0.411                    | -0.039 | 0.120 |  |
|                  |          | WWE2      | 0.243                  | -0.207 | 0.322 |  | 0.294                    | -0.156 | 0.271 |  | 0.367                    | -0.083 | 0.191 |  |
|                  |          | WWE3      | 0.262                  | -0.188 | 0.310 |  | 0.281                    | -0.169 | 0.280 |  | 0.322                    | -0.128 | 0.246 |  |
|                  |          | FWE       | 0.316                  | -0.134 | 0.254 |  | 0.360                    | -0.090 | 0.201 |  | 0.425                    | -0.025 | 0.103 |  |
|                  |          | MLE       | 0.389                  | -0.061 | 0.152 |  | 0.424                    | -0.026 | 0.085 |  | 0.446                    | -0.004 | 0.042 |  |
| $\hat{\omega}$   | 0.000    | ALL       | -                      | -      | -     |  | -                        | -      | -     |  | -                        | -      | -     |  |
| $\hat{\alpha}_2$ | 0.500    | WWE1      | 0.341                  | -0.159 | 0.593 |  | 0.341                    | -0.159 | 0.573 |  | 0.287                    | -0.213 | 0.537 |  |
|                  |          | WWE2      | 0.414                  | -0.086 | 0.583 |  | 0.431                    | -0.069 | 0.528 |  | 0.413                    | -0.087 | 0.484 |  |
|                  |          | WWE3      | 0.434                  | -0.066 | 0.571 |  | 0.478                    | -0.022 | 0.513 |  | 0.494                    | -0.006 | 0.419 |  |
|                  |          | FWE       | 0.510                  | 0.010  | 0.492 |  | 0.525                    | 0.025  | 0.438 |  | 0.523                    | 0.023  | 0.366 |  |
|                  |          | MLE       | 0.521                  | 0.021  | 0.257 |  | 0.500                    | 0.000  | 0.185 |  | 0.496                    | -0.004 | 0.124 |  |
| $\hat{\beta}_1$  | 0.500    | WWE1      | 0.618                  | 0.118  | 0.330 |  | 0.579                    | 0.079  | 0.277 |  | 0.539                    | 0.039  | 0.211 |  |
|                  |          | WWE2      | 0.628                  | 0.128  | 0.323 |  | 0.622                    | 0.122  | 0.267 |  | 0.574                    | 0.074  | 0.214 |  |
|                  |          | WWE3      | 0.631                  | 0.131  | 0.311 |  | 0.631                    | 0.131  | 0.262 |  | 0.599                    | 0.099  | 0.223 |  |
|                  |          | FWE       | 0.595                  | 0.095  | 0.281 |  | 0.582                    | 0.082  | 0.219 |  | 0.529                    | 0.029  | 0.147 |  |
|                  |          | MLE       | 0.552                  | 0.052  | 0.161 |  | 0.529                    | 0.029  | 0.104 |  | 0.508                    | 0.008  | 0.066 |  |
| $\hat{\theta}$   | -0.300   | WWE1      | -0.342                 | -0.042 | 0.280 |  | -0.351                   | -0.051 | 0.231 |  | -0.386                   | -0.086 | 0.183 |  |
|                  |          | WWE2      | -0.277                 | 0.023  | 0.271 |  | -0.276                   | 0.024  | 0.220 |  | -0.298                   | 0.002  | 0.170 |  |
|                  |          | WWE3      | -0.243                 | 0.057  | 0.266 |  | -0.245                   | 0.055  | 0.219 |  | -0.260                   | 0.040  | 0.161 |  |
|                  |          | FWE       | -0.247                 | 0.053  | 0.245 |  | -0.233                   | 0.067  | 0.194 |  | -0.245                   | 0.055  | 0.147 |  |
|                  |          | MLE       | -0.304                 | -0.004 | 0.050 |  | -0.304                   | -0.004 | 0.036 |  | -0.302                   | -0.002 | 0.024 |  |
| $\hat{\gamma}$   | 0.500    | WWE1      | 0.498                  | -0.002 | 0.367 |  | 0.499                    | -0.001 | 0.291 |  | 0.501                    | 0.001  | 0.226 |  |
|                  |          | WWE2      | 0.538                  | 0.038  | 0.355 |  | 0.525                    | 0.025  | 0.279 |  | 0.531                    | 0.031  | 0.218 |  |
|                  |          | WWE3      | 0.535                  | 0.035  | 0.340 |  | 0.524                    | 0.024  | 0.259 |  | 0.524                    | 0.024  | 0.203 |  |
|                  |          | FWE       | 0.511                  | 0.011  | 0.315 |  | 0.515                    | 0.015  | 0.245 |  | 0.521                    | 0.021  | 0.190 |  |
|                  |          | MLE       | 0.514                  | 0.014  | 0.090 |  | 0.513                    | 0.013  | 0.064 |  | 0.510                    | 0.010  | 0.042 |  |
| WWE1(Haar)       | WWE2(D4) | WWE3(LA8) |                        |        |       |  |                          |        |       |  |                          |        |       |  |

Table 3: Monte Carlo 2a: d=0.45; MLE, FWE, Haar, D4, LA8

| PARAM            | TRUE     | METHOD    | N=2 <sup>12</sup> (4096) |        |       |  | N=2 <sup>13</sup> (8192) |        |       |  | N=2 <sup>14</sup> (16384) |        |       |  |
|------------------|----------|-----------|--------------------------|--------|-------|--|--------------------------|--------|-------|--|---------------------------|--------|-------|--|
|                  |          |           | MEAN                     | BIAS   | RMSE  |  | MEAN                     | BIAS   | RMSE  |  | MEAN                      | BIAS   | RMSE  |  |
| $\hat{d}$        | 0.450    | WWE1      | 0.439                    | -0.011 | 0.064 |  | 0.450                    | 0.000  | 0.039 |  | 0.456                     | 0.006  | 0.028 |  |
|                  |          | WWE2      | 0.422                    | -0.028 | 0.097 |  | 0.449                    | -0.001 | 0.043 |  | 0.458                     | 0.008  | 0.031 |  |
|                  |          | WWE3      | 0.401                    | -0.049 | 0.137 |  | 0.437                    | -0.013 | 0.058 |  | 0.451                     | 0.001  | 0.033 |  |
|                  |          | FWE       | 0.445                    | -0.005 | 0.050 |  | 0.454                    | 0.004  | 0.034 |  | 0.456                     | 0.006  | 0.026 |  |
|                  |          | MLE       | 0.450                    | 0.000  | 0.031 |  | -                        | -      | -     |  | -                         | -      | -     |  |
| $\hat{\omega}$   | 0.000    | ALL       | -                        | -      | -     |  | -                        | -      | -     |  | -                         | -      | -     |  |
| $\hat{\alpha}_2$ | 0.500    | WWE1      | 0.274                    | -0.226 | 0.476 |  | 0.214                    | -0.286 | 0.423 |  | 0.211                     | -0.289 | 0.366 |  |
|                  |          | WWE2      | 0.374                    | -0.126 | 0.425 |  | 0.363                    | -0.137 | 0.352 |  | 0.340                     | -0.160 | 0.297 |  |
|                  |          | WWE3      | 0.452                    | -0.048 | 0.373 |  | 0.431                    | -0.069 | 0.304 |  | 0.421                     | -0.079 | 0.246 |  |
|                  |          | FWE       | 0.543                    | 0.043  | 0.309 |  | 0.537                    | 0.037  | 0.244 |  | 0.525                     | 0.025  | 0.182 |  |
|                  |          | MLE       | 0.498                    | -0.002 | 0.091 |  | -                        | -      | -     |  | -                         | -      | -     |  |
| $\hat{\beta}_1$  | 0.500    | WWE1      | 0.515                    | 0.015  | 0.158 |  | 0.513                    | 0.013  | 0.117 |  | 0.502                     | 0.002  | 0.087 |  |
|                  |          | WWE2      | 0.539                    | 0.039  | 0.153 |  | 0.513                    | 0.013  | 0.108 |  | 0.504                     | 0.004  | 0.081 |  |
|                  |          | WWE3      | 0.549                    | 0.049  | 0.161 |  | 0.524                    | 0.024  | 0.106 |  | 0.508                     | 0.008  | 0.078 |  |
|                  |          | FWE       | 0.508                    | 0.008  | 0.098 |  | 0.495                    | -0.005 | 0.075 |  | 0.492                     | -0.008 | 0.056 |  |
|                  |          | MLE       | 0.502                    | 0.002  | 0.047 |  | -                        | -      | -     |  | -                         | -      | -     |  |
| $\hat{\theta}$   | -0.300   | WWE1      | -0.410                   | -0.110 | 0.154 |  | -0.432                   | -0.132 | 0.150 |  | -0.437                    | -0.137 | 0.146 |  |
|                  |          | WWE2      | -0.327                   | -0.027 | 0.120 |  | -0.346                   | -0.046 | 0.086 |  | -0.355                    | -0.055 | 0.076 |  |
|                  |          | WWE3      | -0.290                   | 0.010  | 0.117 |  | -0.309                   | -0.009 | 0.072 |  | -0.319                    | -0.019 | 0.051 |  |
|                  |          | FWE       | -0.261                   | 0.039  | 0.109 |  | -0.278                   | 0.022  | 0.071 |  | -0.288                    | 0.012  | 0.043 |  |
|                  |          | MLE       | -0.301                   | -0.001 | 0.017 |  | -                        | -      | -     |  | -                         | -      | -     |  |
| $\hat{\gamma}$   | 0.500    | WWE1      | 0.484                    | -0.016 | 0.178 |  | 0.479                    | -0.021 | 0.129 |  | 0.476                     | -0.024 | 0.096 |  |
|                  |          | WWE2      | 0.513                    | 0.013  | 0.171 |  | 0.506                    | 0.006  | 0.128 |  | 0.504                     | 0.004  | 0.096 |  |
|                  |          | WWE3      | 0.512                    | 0.012  | 0.164 |  | 0.508                    | 0.008  | 0.124 |  | 0.507                     | 0.007  | 0.092 |  |
|                  |          | FWE       | 0.508                    | 0.008  | 0.154 |  | 0.505                    | 0.005  | 0.116 |  | 0.504                     | 0.004  | 0.088 |  |
|                  |          | MLE       | 0.506                    | 0.006  | 0.030 |  | -                        | -      | -     |  | -                         | -      | -     |  |
| WWE1(Haar)       | WWE2(D4) | WWE3(LA8) |                          |        |       |  |                          |        |       |  |                           |        |       |  |

Table 4: Monte Carlo 2b: d=0.45; MLE, FWE, Haar, D4, LA8



| PARAM            | TRUE     | METHOD    | N=2 <sup>9</sup> (512) |        |       | N=2 <sup>10</sup> (1024) |        |       | N=2 <sup>11</sup> (2048) |        |       |
|------------------|----------|-----------|------------------------|--------|-------|--------------------------|--------|-------|--------------------------|--------|-------|
|                  |          |           | MEAN                   | BIAS   | RMSE  | MEAN                     | BIAS   | RMSE  | MEAN                     | BIAS   | RMSE  |
| $\hat{d}$        | -0.250   | WWE1      | -0.213                 | 0.037  | 0.321 | -0.219                   | 0.031  | 0.285 | -0.243                   | 0.007  | 0.246 |
|                  |          | WWE2      | -0.153                 | 0.097  | 0.366 | -0.222                   | 0.028  | 0.301 | -0.255                   | -0.005 | 0.247 |
|                  |          | WWE3      | -0.077                 | 0.173  | 0.422 | -0.170                   | 0.080  | 0.345 | -0.275                   | -0.025 | 0.250 |
|                  |          | FWE       | -0.249                 | 0.001  | 0.263 | -0.259                   | -0.009 | 0.233 | -0.275                   | -0.025 | 0.202 |
|                  |          | MLE       | -0.115                 | 0.135  | 0.200 | -0.141                   | 0.109  | 0.158 | -0.165                   | 0.085  | 0.124 |
| $\hat{\omega}$   | 0.000    | ALL       | -                      | -      | -     | -                        | -      | -     | -                        | -      | -     |
| $\hat{\alpha}_2$ | 0.500    | WWE1      | 0.423                  | -0.077 | 0.595 | 0.432                    | -0.068 | 0.588 | 0.449                    | -0.051 | 0.541 |
|                  |          | WWE2      | 0.426                  | -0.074 | 0.607 | 0.521                    | 0.021  | 0.540 | 0.523                    | 0.023  | 0.503 |
|                  |          | WWE3      | 0.396                  | -0.104 | 0.622 | 0.474                    | -0.026 | 0.574 | 0.548                    | 0.048  | 0.492 |
|                  |          | FWE       | 0.563                  | 0.063  | 0.474 | 0.597                    | 0.097  | 0.403 | 0.609                    | 0.109  | 0.329 |
|                  |          | MLE       | 0.550                  | 0.050  | 0.248 | 0.539                    | 0.039  | 0.173 | 0.520                    | 0.020  | 0.118 |
| $\hat{\beta}_1$  | 0.500    | WWE1      | 0.472                  | -0.028 | 0.425 | 0.492                    | -0.008 | 0.394 | 0.513                    | 0.013  | 0.363 |
|                  |          | WWE2      | 0.424                  | -0.076 | 0.436 | 0.455                    | -0.045 | 0.407 | 0.519                    | 0.019  | 0.322 |
|                  |          | WWE3      | 0.396                  | -0.104 | 0.438 | 0.437                    | -0.063 | 0.406 | 0.528                    | 0.028  | 0.313 |
|                  |          | FWE       | 0.430                  | -0.070 | 0.404 | 0.435                    | -0.065 | 0.365 | 0.469                    | -0.031 | 0.297 |
|                  |          | MLE       | 0.327                  | -0.173 | 0.291 | 0.356                    | -0.144 | 0.224 | 0.400                    | -0.100 | 0.158 |
| $\hat{\theta}$   | -0.300   | WWE1      | -0.267                 | 0.033  | 0.320 | -0.268                   | 0.032  | 0.270 | -0.272                   | 0.028  | 0.236 |
|                  |          | WWE2      | -0.241                 | 0.059  | 0.315 | -0.233                   | 0.067  | 0.265 | -0.240                   | 0.060  | 0.237 |
|                  |          | WWE3      | -0.236                 | 0.064  | 0.315 | -0.231                   | 0.069  | 0.264 | -0.231                   | 0.069  | 0.231 |
|                  |          | FWE       | -0.255                 | 0.045  | 0.308 | -0.247                   | 0.053  | 0.259 | -0.228                   | 0.072  | 0.224 |
|                  |          | MLE       | -0.297                 | 0.003  | 0.059 | -0.298                   | 0.002  | 0.040 | -0.299                   | 0.001  | 0.029 |
| $\hat{\gamma}$   | 0.500    | WWE1      | 0.418                  | -0.082 | 0.295 | 0.398                    | -0.102 | 0.236 | 0.399                    | -0.101 | 0.184 |
|                  |          | WWE2      | 0.496                  | -0.004 | 0.317 | 0.466                    | -0.034 | 0.241 | 0.449                    | -0.051 | 0.178 |
|                  |          | WWE3      | 0.540                  | 0.040  | 0.335 | 0.504                    | 0.004  | 0.248 | 0.471                    | -0.029 | 0.163 |
|                  |          | FWE       | 0.501                  | 0.001  | 0.244 | 0.489                    | -0.011 | 0.172 | 0.485                    | -0.015 | 0.133 |
|                  |          | MLE       | 0.488                  | -0.012 | 0.098 | 0.487                    | -0.013 | 0.068 | 0.493                    | -0.007 | 0.049 |
| WWE1(Haar)       | WWE2(D4) | WWE3(LA8) |                        |        |       |                          |        |       |                          |        |       |

Table 5: Monte Carlo 3a: d=-0.25; MLE, FWE, Haar, D4, LA8

| PARAM            | TRUE     | METHOD    | N=2 <sup>12</sup> (4096) |        |       |  | N=2 <sup>13</sup> (8192) |        |       |  | N=2 <sup>14</sup> (16384) |        |       |  |
|------------------|----------|-----------|--------------------------|--------|-------|--|--------------------------|--------|-------|--|---------------------------|--------|-------|--|
|                  |          |           | MEAN                     | BIAS   | RMSE  |  | MEAN                     | BIAS   | RMSE  |  | MEAN                      | BIAS   | RMSE  |  |
| $\hat{d}$        | -0.250   | WWE1      | -0.246                   | 0.004  | 0.212 |  | -0.232                   | 0.018  | 0.176 |  | -0.202                    | 0.048  | 0.147 |  |
|                  |          | WWE2      | -0.274                   | -0.024 | 0.193 |  | -0.269                   | -0.019 | 0.164 |  | -0.253                    | -0.003 | 0.137 |  |
|                  |          | WWE3      | -0.284                   | -0.034 | 0.197 |  | -0.280                   | -0.030 | 0.166 |  | -0.267                    | -0.017 | 0.133 |  |
|                  |          | FWE       | -0.272                   | -0.022 | 0.168 |  | -0.277                   | -0.027 | 0.144 |  | -0.269                    | -0.019 | 0.119 |  |
|                  |          | MLE       | -0.183                   | 0.067  | 0.095 |  | -                        | -      | -     |  | -                         | -      | -     |  |
| $\hat{\omega}$   | 0.000    | ALL       | -                        | -      | -     |  | -                        | -      | -     |  | -                         | -      | -     |  |
| $\hat{\alpha}_2$ | 0.500    | WWE1      | 0.465                    | -0.035 | 0.481 |  | 0.441                    | -0.059 | 0.419 |  | 0.430                     | -0.070 | 0.370 |  |
|                  |          | WWE2      | 0.527                    | 0.027  | 0.440 |  | 0.528                    | 0.028  | 0.368 |  | 0.478                     | -0.022 | 0.311 |  |
|                  |          | WWE3      | 0.576                    | 0.076  | 0.410 |  | 0.565                    | 0.065  | 0.359 |  | 0.546                     | 0.046  | 0.292 |  |
|                  |          | FWE       | 0.586                    | 0.086  | 0.256 |  | 0.559                    | 0.059  | 0.189 |  | 0.530                     | 0.030  | 0.134 |  |
|                  |          | MLE       | 0.512                    | 0.012  | 0.077 |  | -                        | -      | -     |  | -                         | -      | -     |  |
| $\hat{\beta}_1$  | 0.500    | WWE1      | 0.522                    | 0.022  | 0.303 |  | 0.507                    | 0.007  | 0.268 |  | 0.486                     | -0.014 | 0.224 |  |
|                  |          | WWE2      | 0.528                    | 0.028  | 0.284 |  | 0.521                    | 0.021  | 0.236 |  | 0.526                     | 0.026  | 0.195 |  |
|                  |          | WWE3      | 0.514                    | 0.014  | 0.268 |  | 0.515                    | 0.015  | 0.223 |  | 0.508                     | 0.008  | 0.187 |  |
|                  |          | FWE       | 0.479                    | -0.021 | 0.240 |  | 0.499                    | -0.001 | 0.168 |  | 0.504                     | 0.004  | 0.133 |  |
|                  |          | MLE       | 0.427                    | -0.073 | 0.115 |  | -                        | -      | -     |  | -                         | -      | -     |  |
| $\hat{\theta}$   | -0.300   | WWE1      | -0.302                   | -0.002 | 0.196 |  | -0.325                   | -0.025 | 0.161 |  | -0.345                    | -0.045 | 0.124 |  |
|                  |          | WWE2      | -0.269                   | 0.031  | 0.199 |  | -0.283                   | 0.017  | 0.162 |  | -0.307                    | -0.007 | 0.123 |  |
|                  |          | WWE3      | -0.254                   | 0.046  | 0.201 |  | -0.263                   | 0.037  | 0.170 |  | -0.282                    | 0.018  | 0.126 |  |
|                  |          | FWE       | -0.252                   | 0.048  | 0.193 |  | -0.257                   | 0.043  | 0.164 |  | -0.274                    | 0.026  | 0.125 |  |
|                  |          | MLE       | -0.299                   | 0.001  | 0.021 |  | -                        | -      | -     |  | -                         | -      | -     |  |
| $\hat{\gamma}$   | 0.500    | WWE1      | 0.393                    | -0.107 | 0.161 |  | 0.395                    | -0.105 | 0.137 |  | 0.392                     | -0.108 | 0.126 |  |
|                  |          | WWE2      | 0.449                    | -0.051 | 0.134 |  | 0.446                    | -0.054 | 0.106 |  | 0.446                     | -0.054 | 0.089 |  |
|                  |          | WWE3      | 0.472                    | -0.028 | 0.117 |  | 0.472                    | -0.028 | 0.090 |  | 0.472                     | -0.028 | 0.071 |  |
|                  |          | FWE       | 0.487                    | -0.013 | 0.101 |  | 0.493                    | -0.007 | 0.078 |  | 0.496                     | -0.004 | 0.057 |  |
|                  |          | MLE       | 0.499                    | -0.001 | 0.033 |  | -                        | -      | -     |  | -                         | -      | -     |  |
| WWE1(Haar)       | WWE2(D4) | WWE3(LA8) |                          |        |       |  |                          |        |       |  |                           |        |       |  |

Table 6: Monte Carlo 3b: d=-0.25; MLE, FWE, Haar, D4, LA8

## **6 Partial Decomposition II**

| PAR              | TRUE     | METHOD    | N=2 <sup>9</sup> (512); level 4 |        |       | N=2 <sup>10</sup> (1024); level 4 |        |       | N=2 <sup>11</sup> (2048); level 4 |        |       |
|------------------|----------|-----------|---------------------------------|--------|-------|-----------------------------------|--------|-------|-----------------------------------|--------|-------|
|                  |          |           | MEAN                            | BIAS   | RMSE  | MEAN                              | BIAS   | RMSE  | MEAN                              | BIAS   | RMSE  |
| $\hat{d}$        | 0.250    | WWE1      | 0.268                           | 0.018  | 0.279 | 0.270                             | 0.020  | 0.245 | 0.275                             | 0.025  | 0.210 |
|                  |          | WWE2      | 0.293                           | 0.043  | 0.267 | 0.304                             | 0.054  | 0.228 | 0.309                             | 0.059  | 0.196 |
|                  |          | WWE3      | 0.306                           | 0.056  | 0.252 | 0.301                             | 0.051  | 0.226 | 0.307                             | 0.057  | 0.189 |
|                  |          | FWE       | 0.131                           | -0.119 | 0.287 | 0.163                             | -0.087 | 0.236 | 0.214                             | -0.036 | 0.145 |
|                  |          | MLE       | 0.177                           | -0.073 | 0.176 | 0.212                             | -0.038 | 0.124 | 0.236                             | -0.014 | 0.065 |
| $\hat{\omega}$   | 0.000    | ALL       | -                               | -      | -     | -                                 | -      | -     | -                                 | -      | -     |
| $\hat{\alpha}_2$ | 0.500    | WWE1      | 0.289                           | -0.211 | 0.649 | 0.334                             | -0.166 | 0.610 | 0.302                             | -0.198 | 0.603 |
|                  |          | WWE2      | 0.328                           | -0.172 | 0.637 | 0.351                             | -0.149 | 0.620 | 0.386                             | -0.114 | 0.568 |
|                  |          | WWE3      | 0.360                           | -0.140 | 0.636 | 0.409                             | -0.091 | 0.592 | 0.431                             | -0.069 | 0.523 |
|                  |          | FWE       | 0.572                           | 0.072  | 0.471 | 0.564                             | 0.064  | 0.401 | 0.571                             | 0.071  | 0.348 |
|                  |          | MLE       | 0.552                           | 0.052  | 0.251 | 0.509                             | 0.009  | 0.187 | 0.507                             | 0.007  | 0.127 |
| $\hat{\beta}_1$  | 0.500    | WWE1      | 0.525                           | 0.025  | 0.420 | 0.504                             | 0.004  | 0.365 | 0.528                             | 0.028  | 0.279 |
|                  |          | WWE2      | 0.521                           | 0.021  | 0.417 | 0.522                             | 0.022  | 0.344 | 0.504                             | 0.004  | 0.266 |
|                  |          | WWE3      | 0.530                           | 0.030  | 0.411 | 0.524                             | 0.024  | 0.320 | 0.505                             | 0.005  | 0.252 |
|                  |          | FWE       | 0.525                           | 0.025  | 0.350 | 0.522                             | 0.022  | 0.292 | 0.512                             | 0.012  | 0.199 |
|                  |          | MLE       | 0.547                           | 0.047  | 0.198 | 0.530                             | 0.030  | 0.141 | 0.511                             | 0.011  | 0.089 |
| $\hat{\theta}$   | -0.300   | WWE1      | -0.307                          | -0.007 | 0.299 | -0.326                            | -0.026 | 0.273 | -0.337                            | -0.037 | 0.233 |
|                  |          | WWE2      | -0.270                          | 0.030  | 0.293 | -0.279                            | 0.021  | 0.260 | -0.285                            | 0.015  | 0.217 |
|                  |          | WWE3      | -0.252                          | 0.048  | 0.284 | -0.261                            | 0.039  | 0.260 | -0.263                            | 0.037  | 0.210 |
|                  |          | FWE       | -0.236                          | 0.064  | 0.272 | -0.229                            | 0.071  | 0.226 | -0.225                            | 0.075  | 0.179 |
|                  |          | MLE       | -0.302                          | -0.002 | 0.053 | -0.305                            | -0.005 | 0.038 | -0.302                            | -0.002 | 0.025 |
| $\hat{\gamma}$   | 0.500    | WWE1      | 0.539                           | 0.039  | 0.420 | 0.515                             | 0.015  | 0.314 | 0.487                             | -0.013 | 0.229 |
|                  |          | WWE2      | 0.612                           | 0.112  | 0.434 | 0.565                             | 0.065  | 0.340 | 0.527                             | 0.027  | 0.231 |
|                  |          | WWE3      | 0.613                           | 0.113  | 0.444 | 0.567                             | 0.067  | 0.327 | 0.533                             | 0.033  | 0.228 |
|                  |          | FWE       | 0.514                           | 0.014  | 0.269 | 0.513                             | 0.013  | 0.214 | 0.505                             | 0.005  | 0.170 |
|                  |          | MLE       | 0.496                           | -0.004 | 0.089 | 0.503                             | 0.003  | 0.061 | 0.502                             | 0.002  | 0.042 |
| WWE1(Haar)       | WWE2(D4) | WWE3(LA8) |                                 |        |       |                                   |        |       |                                   |        |       |

Table 7: Monte Carlo 2a (Level 4): d=0.25; MLE, FWE, Haar, D4, LA8

| PAR              | TRUE     | METHOD    | N=2 <sup>12</sup> (4096); level 4 |        |       | N=2 <sup>13</sup> (8192); level 4 |        |       | N=2 <sup>14</sup> (16384); level 4 |        |       |
|------------------|----------|-----------|-----------------------------------|--------|-------|-----------------------------------|--------|-------|------------------------------------|--------|-------|
|                  |          |           | MEAN                              | BIAS   | RMSE  | MEAN                              | BIAS   | RMSE  | MEAN                               | BIAS   | RMSE  |
| $\hat{d}$        | 0.250    | WWE1      | 0.268                             | 0.018  | 0.182 | 0.275                             | 0.025  | 0.159 | 0.296                              | 0.046  | 0.136 |
|                  |          | WWE2      | 0.290                             | 0.040  | 0.163 | 0.281                             | 0.031  | 0.142 | 0.276                              | 0.026  | 0.132 |
|                  |          | WWE3      | 0.295                             | 0.045  | 0.160 | 0.270                             | 0.020  | 0.145 | 0.274                              | 0.024  | 0.126 |
|                  |          | FWE       | 0.235                             | -0.015 | 0.091 | 0.251                             | 0.001  | 0.050 | 0.250                              | 0.000  | 0.035 |
|                  |          | MLE       | 0.241                             | -0.009 | 0.046 | -                                 | -      | -     | -                                  | -      | -     |
| $\hat{\omega}$   | 0.000    | ALL       | -                                 | -      | -     | -                                 | -      | -     | -                                  | -      | -     |
| $\hat{\alpha}_2$ | 0.500    | WWE1      | 0.348                             | -0.152 | 0.495 | 0.310                             | -0.190 | 0.420 | 0.290                              | -0.210 | 0.351 |
|                  |          | WWE2      | 0.397                             | -0.103 | 0.482 | 0.393                             | -0.107 | 0.375 | 0.361                              | -0.139 | 0.313 |
|                  |          | WWE3      | 0.463                             | -0.037 | 0.429 | 0.469                             | -0.031 | 0.342 | 0.431                              | -0.069 | 0.260 |
|                  |          | FWE       | 0.555                             | 0.055  | 0.287 | 0.547                             | 0.047  | 0.228 | 0.516                              | 0.016  | 0.168 |
|                  |          | MLE       | 0.502                             | 0.002  | 0.087 | -                                 | -      | -     | -                                  | -      | -     |
| $\hat{\beta}_1$  | 0.500    | WWE1      | 0.489                             | -0.011 | 0.221 | 0.480                             | -0.020 | 0.165 | 0.463                              | -0.037 | 0.135 |
|                  |          | WWE2      | 0.501                             | 0.001  | 0.202 | 0.485                             | -0.015 | 0.152 | 0.492                              | -0.008 | 0.127 |
|                  |          | WWE3      | 0.484                             | -0.016 | 0.195 | 0.483                             | -0.017 | 0.144 | 0.487                              | -0.013 | 0.111 |
|                  |          | FWE       | 0.505                             | 0.005  | 0.130 | 0.488                             | -0.012 | 0.097 | 0.498                              | -0.002 | 0.064 |
|                  |          | MLE       | 0.509                             | 0.009  | 0.063 | -                                 | -      | -     | -                                  | -      | -     |
| $\hat{\theta}$   | -0.300   | WWE1      | -0.357                            | -0.057 | 0.181 | -0.383                            | -0.083 | 0.142 | -0.393                             | -0.093 | 0.125 |
|                  |          | WWE2      | -0.311                            | -0.011 | 0.173 | -0.327                            | -0.027 | 0.121 | -0.337                             | -0.037 | 0.099 |
|                  |          | WWE3      | -0.285                            | 0.015  | 0.165 | -0.297                            | 0.003  | 0.114 | -0.309                             | -0.009 | 0.089 |
|                  |          | FWE       | -0.246                            | 0.054  | 0.147 | -0.269                            | 0.031  | 0.101 | -0.279                             | 0.021  | 0.076 |
|                  |          | MLE       | -0.301                            | -0.001 | 0.018 | -                                 | -      | -     | -                                  | -      | -     |
| $\hat{\gamma}$   | 0.500    | WWE1      | 0.461                             | -0.039 | 0.171 | 0.453                             | -0.047 | 0.128 | 0.454                              | -0.046 | 0.101 |
|                  |          | WWE2      | 0.505                             | 0.005  | 0.168 | 0.492                             | -0.008 | 0.122 | 0.494                              | -0.006 | 0.092 |
|                  |          | WWE3      | 0.511                             | 0.011  | 0.163 | 0.503                             | 0.003  | 0.118 | 0.504                              | 0.004  | 0.089 |
|                  |          | FWE       | 0.500                             | 0.000  | 0.139 | 0.501                             | 0.001  | 0.107 | 0.504                              | 0.004  | 0.083 |
|                  |          | MLE       | 0.501                             | 0.001  | 0.030 | -                                 | -      | -     | -                                  | -      | -     |
| WWE1(Haar)       | WWE2(D4) | WWE3(LA8) |                                   |        |       |                                   |        |       |                                    |        |       |

Table 8: Monte Carlo 2b (Level 4): d=0.25; MLE, FWE, Haar, D4, LA8

| PARAM            | TRUE     | METHOD    | N=2 <sup>9</sup> (512); level 5 |        |       |  | N=2 <sup>10</sup> (1024); level 5 |        |       |  | N=2 <sup>11</sup> (2048); level 5 |        |       |  |
|------------------|----------|-----------|---------------------------------|--------|-------|--|-----------------------------------|--------|-------|--|-----------------------------------|--------|-------|--|
|                  |          |           | MEAN                            | BIAS   | RMSE  |  | MEAN                              | BIAS   | RMSE  |  | MEAN                              | BIAS   | RMSE  |  |
| $\hat{d}$        | 0.250    | WWE1      | 0.184                           | -0.066 | 0.299 |  | 0.206                             | -0.044 | 0.276 |  | 0.190                             | -0.060 | 0.258 |  |
|                  |          | WWE2      | 0.215                           | -0.035 | 0.289 |  | 0.214                             | -0.036 | 0.261 |  | 0.203                             | -0.047 | 0.245 |  |
|                  |          | WWE3      | 0.221                           | -0.029 | 0.287 |  | 0.212                             | -0.038 | 0.260 |  | 0.213                             | -0.037 | 0.243 |  |
|                  |          | FWE       | 0.127                           | -0.123 | 0.284 |  | 0.172                             | -0.078 | 0.224 |  | 0.212                             | -0.038 | 0.156 |  |
|                  |          | MLE       | 0.174                           | -0.076 | 0.183 |  | 0.221                             | -0.029 | 0.111 |  | 0.232                             | -0.018 | 0.072 |  |
| $\hat{\omega}$   | 0.000    | ALL       | -                               | -      | -     |  | -                                 | -      | -     |  | -                                 | -      | -     |  |
| $\hat{\alpha}_2$ | 0.500    | WWE1      | 0.337                           | -0.163 | 0.627 |  | 0.399                             | -0.101 | 0.597 |  | 0.455                             | -0.045 | 0.529 |  |
|                  |          | WWE2      | 0.375                           | -0.125 | 0.629 |  | 0.450                             | -0.050 | 0.563 |  | 0.495                             | -0.005 | 0.494 |  |
|                  |          | WWE3      | 0.422                           | -0.078 | 0.590 |  | 0.484                             | -0.016 | 0.532 |  | 0.557                             | 0.057  | 0.459 |  |
|                  |          | FWE       | 0.570                           | 0.070  | 0.460 |  | 0.611                             | 0.111  | 0.402 |  | 0.583                             | 0.083  | 0.341 |  |
|                  |          | MLE       | 0.536                           | 0.036  | 0.244 |  | 0.529                             | 0.029  | 0.174 |  | 0.507                             | 0.007  | 0.123 |  |
| $\hat{\beta}_1$  | 0.500    | WWE1      | 0.528                           | 0.028  | 0.396 |  | 0.498                             | -0.002 | 0.365 |  | 0.494                             | -0.006 | 0.323 |  |
|                  |          | WWE2      | 0.516                           | 0.016  | 0.374 |  | 0.508                             | 0.008  | 0.327 |  | 0.500                             | -0.000 | 0.298 |  |
|                  |          | WWE3      | 0.506                           | 0.006  | 0.385 |  | 0.514                             | 0.014  | 0.313 |  | 0.487                             | -0.013 | 0.282 |  |
|                  |          | FWE       | 0.523                           | 0.023  | 0.347 |  | 0.512                             | 0.012  | 0.277 |  | 0.502                             | 0.002  | 0.202 |  |
|                  |          | MLE       | 0.549                           | 0.049  | 0.205 |  | 0.516                             | 0.016  | 0.139 |  | 0.515                             | 0.015  | 0.092 |  |
| $\hat{\theta}$   | -0.300   | WWE1      | -0.308                          | -0.008 | 0.316 |  | -0.306                            | -0.006 | 0.253 |  | -0.313                            | -0.013 | 0.198 |  |
|                  |          | WWE2      | -0.269                          | 0.031  | 0.308 |  | -0.257                            | 0.043  | 0.244 |  | -0.265                            | 0.035  | 0.199 |  |
|                  |          | WWE3      | -0.251                          | 0.049  | 0.301 |  | -0.238                            | 0.062  | 0.238 |  | -0.238                            | 0.062  | 0.192 |  |
|                  |          | FWE       | -0.258                          | 0.042  | 0.289 |  | -0.224                            | 0.076  | 0.221 |  | -0.230                            | 0.070  | 0.180 |  |
|                  |          | MLE       | -0.308                          | -0.008 | 0.054 |  | -0.302                            | -0.002 | 0.037 |  | -0.301                            | -0.001 | 0.025 |  |
| $\hat{\gamma}$   | 0.500    | WWE1      | 0.487                           | -0.013 | 0.379 |  | 0.480                             | -0.020 | 0.275 |  | 0.465                             | -0.035 | 0.208 |  |
|                  |          | WWE2      | 0.548                           | 0.048  | 0.386 |  | 0.526                             | 0.026  | 0.271 |  | 0.508                             | 0.008  | 0.200 |  |
|                  |          | WWE3      | 0.540                           | 0.040  | 0.380 |  | 0.530                             | 0.030  | 0.260 |  | 0.516                             | 0.016  | 0.194 |  |
|                  |          | FWE       | 0.490                           | -0.010 | 0.301 |  | 0.502                             | 0.002  | 0.214 |  | 0.505                             | 0.005  | 0.167 |  |
|                  |          | MLE       | 0.499                           | -0.001 | 0.088 |  | 0.500                             | 0.000  | 0.063 |  | 0.502                             | 0.002  | 0.042 |  |
| WWE1(Haar)       | WWE2(D4) | WWE3(LA8) |                                 |        |       |  |                                   |        |       |  |                                   |        |       |  |

Table 9: Monte Carlo 2c (Level 5): d=0.25; MLE, FWE, Haar, D4, LA8

| PAR              | TRUE     | METHOD    | N=2 <sup>12</sup> (4096); level 5 |        |       | N=2 <sup>13</sup> (8192); level 5 |        |       | N=2 <sup>14</sup> (16384); level 5 |        |       |
|------------------|----------|-----------|-----------------------------------|--------|-------|-----------------------------------|--------|-------|------------------------------------|--------|-------|
|                  |          |           | MEAN                              | BIAS   | RMSE  | MEAN                              | BIAS   | RMSE  | MEAN                               | BIAS   | RMSE  |
| $\hat{d}$        | 0.250    | WWE1      | 0.210                             | -0.040 | 0.240 | 0.219                             | -0.031 | 0.229 | 0.236                              | -0.014 | 0.204 |
|                  |          | WWE2      | 0.213                             | -0.037 | 0.229 | 0.208                             | -0.042 | 0.229 | 0.224                              | -0.026 | 0.212 |
|                  |          | WWE3      | 0.211                             | -0.039 | 0.234 | 0.208                             | -0.042 | 0.228 | 0.216                              | -0.034 | 0.205 |
|                  |          | FWE       | 0.240                             | -0.010 | 0.086 | 0.250                             | 0.000  | 0.049 | 0.251                              | 0.001  | 0.035 |
|                  |          | MLE       | 0.244                             | -0.006 | 0.041 | -                                 | -      | -     | -                                  | -      | -     |
| $\hat{\omega}$   | 0.000    | ALL       | -                                 | -      | -     | -                                 | -      | -     | -                                  | -      | -     |
| $\hat{\alpha}_2$ | 0.500    | WWE1      | 0.472                             | -0.028 | 0.451 | 0.453                             | -0.047 | 0.377 | 0.399                              | -0.101 | 0.337 |
|                  |          | WWE2      | 0.510                             | 0.010  | 0.430 | 0.509                             | 0.009  | 0.365 | 0.483                              | -0.017 | 0.295 |
|                  |          | WWE3      | 0.574                             | 0.074  | 0.387 | 0.584                             | 0.084  | 0.329 | 0.547                              | 0.047  | 0.268 |
|                  |          | FWE       | 0.559                             | 0.059  | 0.288 | 0.539                             | 0.039  | 0.223 | 0.519                              | 0.019  | 0.165 |
|                  |          | MLE       | 0.503                             | 0.003  | 0.086 | -                                 | -      | -     | -                                  | -      | -     |
| $\hat{\beta}_1$  | 0.500    | WWE1      | 0.450                             | -0.050 | 0.324 | 0.444                             | -0.056 | 0.304 | 0.442                              | -0.058 | 0.279 |
|                  |          | WWE2      | 0.486                             | -0.014 | 0.274 | 0.477                             | -0.023 | 0.277 | 0.469                              | -0.031 | 0.259 |
|                  |          | WWE3      | 0.475                             | -0.025 | 0.271 | 0.468                             | -0.032 | 0.265 | 0.474                              | -0.026 | 0.244 |
|                  |          | FWE       | 0.495                             | -0.005 | 0.136 | 0.493                             | -0.007 | 0.091 | 0.496                              | -0.004 | 0.066 |
|                  |          | MLE       | 0.505                             | 0.005  | 0.058 | -                                 | -      | -     | -                                  | -      | -     |
| $\hat{\theta}$   | -0.300   | WWE1      | -0.335                            | -0.035 | 0.162 | -0.365                            | -0.065 | 0.122 | -0.383                             | -0.083 | 0.110 |
|                  |          | WWE2      | -0.279                            | 0.021  | 0.160 | -0.308                            | -0.008 | 0.118 | -0.325                             | -0.025 | 0.080 |
|                  |          | WWE3      | -0.255                            | 0.045  | 0.158 | -0.279                            | 0.021  | 0.115 | -0.295                             | 0.005  | 0.081 |
|                  |          | FWE       | -0.242                            | 0.058  | 0.152 | -0.264                            | 0.036  | 0.112 | -0.279                             | 0.021  | 0.074 |
|                  |          | MLE       | -0.301                            | -0.001 | 0.018 | -                                 | -      | -     | -                                  | -      | -     |
| $\hat{\gamma}$   | 0.500    | WWE1      | 0.457                             | -0.043 | 0.161 | 0.448                             | -0.052 | 0.126 | 0.452                              | -0.048 | 0.097 |
|                  |          | WWE2      | 0.498                             | -0.002 | 0.160 | 0.489                             | -0.011 | 0.118 | 0.488                              | -0.012 | 0.090 |
|                  |          | WWE3      | 0.505                             | 0.005  | 0.152 | 0.499                             | -0.001 | 0.112 | 0.499                              | -0.001 | 0.086 |
|                  |          | FWE       | 0.503                             | 0.003  | 0.139 | 0.501                             | 0.001  | 0.107 | 0.504                              | 0.004  | 0.082 |
|                  |          | MLE       | 0.501                             | 0.001  | 0.029 | -                                 | -      | -     | -                                  | -      | -     |
| WWE1(Haar)       | WWE2(D4) | WWE3(LA8) |                                   |        |       |                                   |        |       |                                    |        |       |

Table 10: Monte Carlo 2d (Level 5): d=0.25; MLE, FWE, Haar, D4, LA8

| PARAM            | TRUE     | METHOD    | N=2 <sup>9</sup> (512); level 6 |        |       | N=2 <sup>10</sup> (1024); level 6 |        |       | N=2 <sup>11</sup> (2048); level 6 |        |       |
|------------------|----------|-----------|---------------------------------|--------|-------|-----------------------------------|--------|-------|-----------------------------------|--------|-------|
|                  |          |           | MEAN                            | BIAS   | RMSE  | MEAN                              | BIAS   | RMSE  | MEAN                              | BIAS   | RMSE  |
| $\hat{d}$        | 0.250    | WWE1      | 0.150                           | -0.100 | 0.314 | 0.143                             | -0.107 | 0.307 | 0.148                             | -0.102 | 0.279 |
|                  |          | WWE2      | 0.144                           | -0.106 | 0.302 | 0.167                             | -0.083 | 0.279 | 0.162                             | -0.088 | 0.268 |
|                  |          | WWE3      | 0.186                           | -0.064 | 0.298 | 0.152                             | -0.098 | 0.283 | 0.157                             | -0.093 | 0.269 |
|                  |          | FWE       | 0.114                           | -0.136 | 0.297 | 0.174                             | -0.076 | 0.226 | 0.211                             | -0.039 | 0.157 |
|                  |          | MLE       | 0.170                           | -0.080 | 0.188 | 0.208                             | -0.042 | 0.123 | 0.231                             | -0.019 | 0.075 |
| $\hat{\omega}$   | 0.000    | ALL       | -                               | -      | -     | -                                 | -      | -     | -                                 | -      | -     |
| $\hat{\alpha}_2$ | 0.500    | WWE1      | 0.413                           | -0.087 | 0.567 | 0.449                             | -0.051 | 0.550 | 0.451                             | -0.049 | 0.485 |
|                  |          | WWE2      | 0.458                           | -0.042 | 0.566 | 0.498                             | -0.002 | 0.532 | 0.523                             | 0.023  | 0.466 |
|                  |          | WWE3      | 0.457                           | -0.043 | 0.570 | 0.531                             | 0.031  | 0.509 | 0.559                             | 0.059  | 0.440 |
|                  |          | FWE       | 0.574                           | 0.074  | 0.453 | 0.611                             | 0.111  | 0.396 | 0.576                             | 0.076  | 0.351 |
|                  |          | MLE       | 0.555                           | 0.055  | 0.256 | 0.523                             | 0.023  | 0.179 | 0.508                             | 0.008  | 0.126 |
| $\hat{\beta}_1$  | 0.500    | WWE1      | 0.528                           | 0.028  | 0.375 | 0.520                             | 0.020  | 0.369 | 0.526                             | 0.026  | 0.328 |
|                  |          | WWE2      | 0.550                           | 0.050  | 0.350 | 0.523                             | 0.023  | 0.345 | 0.523                             | 0.023  | 0.311 |
|                  |          | WWE3      | 0.541                           | 0.041  | 0.324 | 0.548                             | 0.048  | 0.301 | 0.534                             | 0.034  | 0.286 |
|                  |          | FWE       | 0.543                           | 0.043  | 0.340 | 0.506                             | 0.006  | 0.290 | 0.510                             | 0.010  | 0.211 |
|                  |          | MLE       | 0.554                           | 0.054  | 0.197 | 0.529                             | 0.029  | 0.144 | 0.517                             | 0.017  | 0.096 |
| $\hat{\theta}$   | -0.300   | WWE1      | -0.265                          | 0.035  | 0.297 | -0.307                            | -0.007 | 0.243 | -0.321                            | -0.021 | 0.198 |
|                  |          | WWE2      | -0.225                          | 0.075  | 0.287 | -0.258                            | 0.042  | 0.239 | -0.270                            | 0.030  | 0.195 |
|                  |          | WWE3      | -0.221                          | 0.079  | 0.289 | -0.243                            | 0.057  | 0.233 | -0.250                            | 0.050  | 0.193 |
|                  |          | FWE       | -0.215                          | 0.085  | 0.272 | -0.230                            | 0.070  | 0.216 | -0.236                            | 0.064  | 0.178 |
|                  |          | MLE       | -0.302                          | -0.002 | 0.051 | -0.303                            | -0.003 | 0.037 | -0.302                            | -0.002 | 0.026 |
| $\hat{\gamma}$   | 0.500    | WWE1      | 0.474                           | -0.026 | 0.329 | 0.473                             | -0.027 | 0.254 | 0.459                             | -0.041 | 0.204 |
|                  |          | WWE2      | 0.520                           | 0.020  | 0.327 | 0.516                             | 0.016  | 0.245 | 0.496                             | -0.004 | 0.197 |
|                  |          | WWE3      | 0.528                           | 0.028  | 0.318 | 0.511                             | 0.011  | 0.232 | 0.503                             | 0.003  | 0.189 |
|                  |          | FWE       | 0.519                           | 0.019  | 0.275 | 0.504                             | 0.004  | 0.209 | 0.499                             | -0.001 | 0.177 |
|                  |          | MLE       | 0.491                           | -0.009 | 0.091 | 0.500                             | 0.000  | 0.064 | 0.501                             | 0.001  | 0.044 |
| WWE1(Haar)       | WWE2(D4) | WWE3(LA8) |                                 |        |       |                                   |        |       |                                   |        |       |

Table 11: Monte Carlo 2e (Level 6): d=0.25; MLE, FWE, Haar, D4, LA8



| PARAM            | TRUE     | METHOD    | N=2 <sup>12</sup> (4096); level 6 |        |       | N=2 <sup>13</sup> (8192); level 6 |        |       | N=2 <sup>14</sup> (16384); level 6 |        |       |
|------------------|----------|-----------|-----------------------------------|--------|-------|-----------------------------------|--------|-------|------------------------------------|--------|-------|
|                  |          |           | MEAN                              | BIAS   | RMSE  | MEAN                              | BIAS   | RMSE  | MEAN                               | BIAS   | RMSE  |
| $\hat{d}$        | 0.250    | WWE1      | 0.194                             | -0.056 | 0.251 | 0.208                             | -0.042 | 0.230 | 0.243                              | -0.007 | 0.170 |
|                  |          | WWE2      | 0.171                             | -0.079 | 0.255 | 0.211                             | -0.039 | 0.210 | 0.223                              | -0.027 | 0.177 |
|                  |          | WWE3      | 0.170                             | -0.080 | 0.248 | 0.205                             | -0.045 | 0.214 | 0.215                              | -0.035 | 0.174 |
|                  |          | FWE       | 0.240                             | -0.010 | 0.079 | 0.250                             | 0.000  | 0.049 | 0.250                              | 0.000  | 0.035 |
|                  |          | MLE       | 0.243                             | -0.007 | 0.041 | -                                 | -      | -     | -                                  | -      | -     |
| $\hat{\omega}$   | 0.000    | ALL       | -                                 | -      | -     | -                                 | -      | -     | -                                  | -      | -     |
| $\hat{\alpha}_2$ | 0.500    | WWE1      | 0.459                             | -0.041 | 0.431 | 0.448                             | -0.052 | 0.373 | 0.358                              | -0.142 | 0.330 |
|                  |          | WWE2      | 0.539                             | 0.039  | 0.395 | 0.489                             | -0.011 | 0.349 | 0.424                              | -0.076 | 0.286 |
|                  |          | WWE3      | 0.583                             | 0.083  | 0.364 | 0.568                             | 0.068  | 0.319 | 0.488                              | -0.012 | 0.247 |
|                  |          | FWE       | 0.556                             | 0.056  | 0.284 | 0.539                             | 0.039  | 0.223 | 0.516                              | 0.016  | 0.168 |
|                  |          | MLE       | 0.502                             | 0.002  | 0.090 | -                                 | -      | -     | -                                  | -      | -     |
| $\hat{\beta}_1$  | 0.500    | WWE1      | 0.472                             | -0.028 | 0.317 | 0.457                             | -0.043 | 0.301 | 0.465                              | -0.035 | 0.233 |
|                  |          | WWE2      | 0.507                             | 0.007  | 0.292 | 0.487                             | -0.013 | 0.257 | 0.499                              | -0.001 | 0.209 |
|                  |          | WWE3      | 0.512                             | 0.012  | 0.269 | 0.482                             | -0.018 | 0.247 | 0.504                              | 0.004  | 0.195 |
|                  |          | FWE       | 0.500                             | -0.000 | 0.132 | 0.493                             | -0.007 | 0.091 | 0.498                              | -0.002 | 0.064 |
|                  |          | MLE       | 0.506                             | 0.006  | 0.061 | -                                 | -      | -     | -                                  | -      | -     |
| $\hat{\theta}$   | -0.300   | WWE1      | -0.347                            | -0.047 | 0.150 | -0.367                            | -0.067 | 0.120 | -0.385                             | -0.085 | 0.110 |
|                  |          | WWE2      | -0.285                            | 0.015  | 0.146 | -0.311                            | -0.011 | 0.113 | -0.329                             | -0.029 | 0.084 |
|                  |          | WWE3      | -0.260                            | 0.040  | 0.151 | -0.281                            | 0.019  | 0.114 | -0.300                             | -0.000 | 0.080 |
|                  |          | FWE       | -0.248                            | 0.052  | 0.140 | -0.264                            | 0.036  | 0.112 | -0.279                             | 0.021  | 0.076 |
|                  |          | MLE       | -0.302                            | -0.002 | 0.018 | -                                 | -      | -     | -                                  | -      | -     |
| $\hat{\gamma}$   | 0.500    | WWE1      | 0.455                             | -0.045 | 0.156 | 0.449                             | -0.051 | 0.125 | 0.451                              | -0.049 | 0.099 |
|                  |          | WWE2      | 0.491                             | -0.009 | 0.149 | 0.489                             | -0.011 | 0.117 | 0.492                              | -0.008 | 0.090 |
|                  |          | WWE3      | 0.499                             | -0.001 | 0.141 | 0.499                             | -0.001 | 0.111 | 0.502                              | 0.002  | 0.086 |
|                  |          | FWE       | 0.501                             | 0.001  | 0.135 | 0.501                             | 0.001  | 0.107 | 0.504                              | 0.004  | 0.083 |
|                  |          | MLE       | 0.501                             | 0.001  | 0.031 | -                                 | -      | -     | -                                  | -      | -     |
| WWE1(Haar)       | WWE2(D4) | WWE3(LA8) |                                   |        |       |                                   |        |       |                                    |        |       |

Table 12: Monte Carlo 2f (Level 6): d=0.25; MLE, FWE, Haar, D4, LA8

| PARAM            | TRUE     | METHOD    | N=2 <sup>9</sup> (512); level 4 |        |       | N=2 <sup>10</sup> (1024); level 4 |        |       | N=2 <sup>11</sup> (2048); level 4 |        |       |
|------------------|----------|-----------|---------------------------------|--------|-------|-----------------------------------|--------|-------|-----------------------------------|--------|-------|
|                  |          |           | MEAN                            | BIAS   | RMSE  | MEAN                              | BIAS   | RMSE  | MEAN                              | BIAS   | RMSE  |
| $\hat{d}$        | 0.450    | WWE1      | 0.294                           | -0.156 | 0.272 | 0.359                             | -0.091 | 0.201 | 0.368                             | -0.082 | 0.167 |
|                  |          | WWE2      | 0.309                           | -0.141 | 0.257 | 0.384                             | -0.066 | 0.168 | 0.394                             | -0.056 | 0.142 |
|                  |          | WWE3      | 0.328                           | -0.122 | 0.240 | 0.389                             | -0.061 | 0.167 | 0.405                             | -0.045 | 0.122 |
|                  |          | FWE       | 0.320                           | -0.130 | 0.250 | 0.371                             | -0.079 | 0.189 | 0.428                             | -0.022 | 0.093 |
|                  |          | MLE       | 0.388                           | -0.062 | 0.144 | 0.431                             | -0.019 | 0.074 | 0.449                             | -0.001 | 0.041 |
| $\hat{\omega}$   | 0.000    | ALL       | -                               | -      | -     | -                                 | -      | -     | -                                 | -      | -     |
| $\hat{\alpha}_2$ | 0.500    | WWE1      | 0.289                           | -0.211 | 0.643 | 0.296                             | -0.204 | 0.614 | 0.317                             | -0.183 | 0.550 |
|                  |          | WWE2      | 0.355                           | -0.145 | 0.620 | 0.344                             | -0.156 | 0.600 | 0.386                             | -0.114 | 0.515 |
|                  |          | WWE3      | 0.406                           | -0.094 | 0.601 | 0.409                             | -0.091 | 0.568 | 0.453                             | -0.047 | 0.488 |
|                  |          | FWE       | 0.507                           | 0.007  | 0.499 | 0.502                             | 0.002  | 0.424 | 0.542                             | 0.042  | 0.368 |
|                  |          | MLE       | 0.523                           | 0.023  | 0.258 | 0.492                             | -0.008 | 0.191 | 0.496                             | -0.004 | 0.129 |
| $\hat{\beta}_1$  | 0.500    | WWE1      | 0.608                           | 0.108  | 0.350 | 0.579                             | 0.079  | 0.308 | 0.566                             | 0.066  | 0.236 |
|                  |          | WWE2      | 0.616                           | 0.116  | 0.327 | 0.597                             | 0.097  | 0.306 | 0.571                             | 0.071  | 0.228 |
|                  |          | WWE3      | 0.598                           | 0.098  | 0.324 | 0.588                             | 0.088  | 0.292 | 0.563                             | 0.063  | 0.218 |
|                  |          | FWE       | 0.592                           | 0.092  | 0.278 | 0.566                             | 0.066  | 0.221 | 0.526                             | 0.026  | 0.142 |
|                  |          | MLE       | 0.559                           | 0.059  | 0.151 | 0.526                             | 0.026  | 0.097 | 0.503                             | 0.003  | 0.063 |
| $\hat{\theta}$   | -0.300   | WWE1      | -0.321                          | -0.021 | 0.288 | -0.362                            | -0.062 | 0.270 | -0.376                            | -0.076 | 0.211 |
|                  |          | WWE2      | -0.259                          | 0.041  | 0.274 | -0.288                            | 0.012  | 0.246 | -0.305                            | -0.005 | 0.202 |
|                  |          | WWE3      | -0.232                          | 0.068  | 0.261 | -0.259                            | 0.041  | 0.244 | -0.265                            | 0.035  | 0.192 |
|                  |          | FWE       | -0.232                          | 0.068  | 0.247 | -0.235                            | 0.065  | 0.196 | -0.244                            | 0.056  | 0.147 |
|                  |          | MLE       | -0.303                          | -0.003 | 0.049 | -0.306                            | -0.006 | 0.036 | -0.303                            | -0.003 | 0.024 |
| $\hat{\gamma}$   | 0.500    | WWE1      | 0.535                           | 0.035  | 0.378 | 0.539                             | 0.039  | 0.327 | 0.493                             | -0.007 | 0.236 |
|                  |          | WWE2      | 0.577                           | 0.077  | 0.371 | 0.580                             | 0.080  | 0.348 | 0.532                             | 0.032  | 0.231 |
|                  |          | WWE3      | 0.566                           | 0.066  | 0.371 | 0.568                             | 0.068  | 0.319 | 0.527                             | 0.027  | 0.224 |
|                  |          | FWE       | 0.534                           | 0.034  | 0.297 | 0.529                             | 0.029  | 0.240 | 0.511                             | 0.011  | 0.194 |
|                  |          | MLE       | 0.514                           | 0.014  | 0.088 | 0.515                             | 0.015  | 0.062 | 0.511                             | 0.011  | 0.043 |
| WWE1(Haar)       | WWE2(D4) | WWE3(LA8) |                                 |        |       |                                   |        |       |                                   |        |       |

Table 13: Monte Carlo 3a (Level 4): d=0.45; MLE, FWE, Haar, D4, LA8

| PARAM            | TRUE     | METHOD    | N=2 <sup>12</sup> (4096); level 4 |        |       | N=2 <sup>13</sup> (8192); level 4 |        |       | N=2 <sup>14</sup> (16384); level 4 |        |       |
|------------------|----------|-----------|-----------------------------------|--------|-------|-----------------------------------|--------|-------|------------------------------------|--------|-------|
|                  |          |           | MEAN                              | BIAS   | RMSE  | MEAN                              | BIAS   | RMSE  | MEAN                               | BIAS   | RMSE  |
| $\hat{d}$        | 0.450    | WWE1      | 0.372                             | -0.078 | 0.153 | 0.380                             | -0.070 | 0.126 | 0.388                              | -0.062 | 0.110 |
|                  |          | WWE2      | 0.396                             | -0.054 | 0.128 | 0.400                             | -0.050 | 0.106 | 0.406                              | -0.044 | 0.088 |
|                  |          | WWE3      | 0.405                             | -0.045 | 0.116 | 0.404                             | -0.046 | 0.105 | 0.409                              | -0.041 | 0.091 |
|                  |          | FWE       | 0.447                             | -0.003 | 0.053 | 0.454                             | 0.004  | 0.034 | 0.456                              | 0.006  | 0.026 |
|                  |          | MLE       | 0.453                             | 0.003  | 0.031 | -                                 | -      | -     | -                                  | -      | -     |
| $\hat{\omega}$   | 0.000    | ALL       | -                                 | -      | -     | -                                 | -      | -     | -                                  | -      | -     |
| $\hat{\alpha}_2$ | 0.500    | WWE1      | 0.320                             | -0.180 | 0.468 | 0.268                             | -0.232 | 0.416 | 0.243                              | -0.257 | 0.355 |
|                  |          | WWE2      | 0.374                             | -0.126 | 0.452 | 0.375                             | -0.125 | 0.372 | 0.350                              | -0.150 | 0.300 |
|                  |          | WWE3      | 0.437                             | -0.063 | 0.401 | 0.428                             | -0.072 | 0.334 | 0.433                              | -0.067 | 0.246 |
|                  |          | FWE       | 0.531                             | 0.031  | 0.297 | 0.523                             | 0.023  | 0.249 | 0.523                              | 0.023  | 0.183 |
|                  |          | MLE       | 0.503                             | 0.003  | 0.090 | -                                 | -      | -     | -                                  | -      | -     |
| $\hat{\beta}_1$  | 0.500    | WWE1      | 0.536                             | 0.036  | 0.189 | 0.543                             | 0.043  | 0.153 | 0.536                              | 0.036  | 0.116 |
|                  |          | WWE2      | 0.554                             | 0.054  | 0.183 | 0.542                             | 0.042  | 0.137 | 0.540                              | 0.040  | 0.108 |
|                  |          | WWE3      | 0.545                             | 0.045  | 0.157 | 0.546                             | 0.046  | 0.121 | 0.534                              | 0.034  | 0.094 |
|                  |          | FWE       | 0.503                             | 0.003  | 0.102 | 0.496                             | -0.004 | 0.074 | 0.491                              | -0.009 | 0.056 |
|                  |          | MLE       | 0.498                             | -0.002 | 0.048 | -                                 | -      | -     | -                                  | -      | -     |
| $\hat{\theta}$   | -0.300   | WWE1      | -0.392                            | -0.092 | 0.170 | -0.412                            | -0.112 | 0.144 | -0.424                             | -0.124 | 0.137 |
|                  |          | WWE2      | -0.321                            | -0.021 | 0.149 | -0.331                            | -0.031 | 0.098 | -0.345                             | -0.045 | 0.076 |
|                  |          | WWE3      | -0.285                            | 0.015  | 0.136 | -0.297                            | 0.003  | 0.090 | -0.309                             | -0.009 | 0.061 |
|                  |          | FWE       | -0.259                            | 0.041  | 0.112 | -0.275                            | 0.025  | 0.075 | -0.288                             | 0.012  | 0.044 |
|                  |          | MLE       | -0.301                            | -0.001 | 0.017 | -                                 | -      | -     | -                                  | -      | -     |
| $\hat{\gamma}$   | 0.500    | WWE1      | 0.494                             | -0.006 | 0.173 | 0.483                             | -0.017 | 0.133 | 0.474                              | -0.026 | 0.098 |
|                  |          | WWE2      | 0.530                             | 0.030  | 0.176 | 0.514                             | 0.014  | 0.134 | 0.501                              | 0.001  | 0.096 |
|                  |          | WWE3      | 0.528                             | 0.028  | 0.165 | 0.515                             | 0.015  | 0.131 | 0.505                              | 0.005  | 0.092 |
|                  |          | FWE       | 0.517                             | 0.017  | 0.150 | 0.513                             | 0.013  | 0.122 | 0.505                              | 0.005  | 0.088 |
|                  |          | MLE       | 0.506                             | 0.006  | 0.030 | -                                 | -      | -     | -                                  | -      | -     |
| WWE1(Haar)       | WWE2(D4) | WWE3(LA8) |                                   |        |       |                                   |        |       |                                    |        |       |

Table 14: Monte Carlo 3b (Level 4): d=0.45; MLE, FWE, Haar, D4, LA8

| PARAM            | TRUE     | METHOD    | N=2 <sup>9</sup> (512); level 5 |        |       |  | N=2 <sup>10</sup> (1024); level 5 |        |       |  | N=2 <sup>11</sup> (2048); level 5 |        |       |  |
|------------------|----------|-----------|---------------------------------|--------|-------|--|-----------------------------------|--------|-------|--|-----------------------------------|--------|-------|--|
|                  |          |           | MEAN                            | BIAS   | RMSE  |  | MEAN                              | BIAS   | RMSE  |  | MEAN                              | BIAS   | RMSE  |  |
| $\hat{d}$        | 0.450    | WWE1      | 0.272                           | -0.178 | 0.287 |  | 0.295                             | -0.155 | 0.258 |  | 0.312                             | -0.138 | 0.240 |  |
|                  |          | WWE2      | 0.301                           | -0.149 | 0.268 |  | 0.309                             | -0.141 | 0.243 |  | 0.328                             | -0.122 | 0.216 |  |
|                  |          | WWE3      | 0.313                           | -0.137 | 0.259 |  | 0.319                             | -0.131 | 0.229 |  | 0.341                             | -0.109 | 0.208 |  |
|                  |          | FWE       | 0.310                           | -0.140 | 0.255 |  | 0.382                             | -0.068 | 0.174 |  | 0.426                             | -0.024 | 0.105 |  |
|                  |          | MLE       | 0.384                           | -0.066 | 0.155 |  | 0.433                             | -0.017 | 0.073 |  | 0.445                             | -0.005 | 0.047 |  |
| $\hat{\omega}$   | 0.000    | ALL       | -                               | -      | -     |  | -                                 | -      | -     |  | -                                 | -      | -     |  |
| $\hat{\alpha}_2$ | 0.500    | WWE1      | 0.284                           | -0.216 | 0.642 |  | 0.334                             | -0.166 | 0.579 |  | 0.355                             | -0.145 | 0.525 |  |
|                  |          | WWE2      | 0.361                           | -0.139 | 0.614 |  | 0.393                             | -0.107 | 0.565 |  | 0.421                             | -0.079 | 0.487 |  |
|                  |          | WWE3      | 0.389                           | -0.111 | 0.599 |  | 0.440                             | -0.060 | 0.529 |  | 0.491                             | -0.009 | 0.449 |  |
|                  |          | FWE       | 0.506                           | 0.006  | 0.496 |  | 0.559                             | 0.059  | 0.429 |  | 0.548                             | 0.048  | 0.367 |  |
|                  |          | MLE       | 0.511                           | 0.011  | 0.252 |  | 0.511                             | 0.011  | 0.179 |  | 0.500                             | -0.000 | 0.128 |  |
| $\hat{\beta}_1$  | 0.500    | WWE1      | 0.625                           | 0.125  | 0.339 |  | 0.603                             | 0.103  | 0.282 |  | 0.584                             | 0.084  | 0.246 |  |
|                  |          | WWE2      | 0.606                           | 0.106  | 0.334 |  | 0.611                             | 0.111  | 0.264 |  | 0.593                             | 0.093  | 0.224 |  |
|                  |          | WWE3      | 0.613                           | 0.113  | 0.320 |  | 0.612                             | 0.112  | 0.238 |  | 0.579                             | 0.079  | 0.204 |  |
|                  |          | FWE       | 0.593                           | 0.093  | 0.286 |  | 0.552                             | 0.052  | 0.204 |  | 0.520                             | 0.020  | 0.147 |  |
|                  |          | MLE       | 0.561                           | 0.061  | 0.164 |  | 0.518                             | 0.018  | 0.096 |  | 0.508                             | 0.008  | 0.068 |  |
| $\hat{\theta}$   | -0.300   | WWE1      | -0.336                          | -0.036 | 0.304 |  | -0.340                            | -0.040 | 0.241 |  | -0.361                            | -0.061 | 0.185 |  |
|                  |          | WWE2      | -0.270                          | 0.030  | 0.288 |  | -0.272                            | 0.028  | 0.228 |  | -0.285                            | 0.015  | 0.175 |  |
|                  |          | WWE3      | -0.250                          | 0.050  | 0.281 |  | -0.245                            | 0.055  | 0.214 |  | -0.252                            | 0.048  | 0.165 |  |
|                  |          | FWE       | -0.253                          | 0.047  | 0.266 |  | -0.229                            | 0.071  | 0.189 |  | -0.242                            | 0.058  | 0.149 |  |
|                  |          | MLE       | -0.308                          | -0.008 | 0.051 |  | -0.302                            | -0.002 | 0.035 |  | -0.302                            | -0.002 | 0.024 |  |
| $\hat{\gamma}$   | 0.500    | WWE1      | 0.518                           | 0.018  | 0.412 |  | 0.513                             | 0.013  | 0.303 |  | 0.497                             | -0.003 | 0.228 |  |
|                  |          | WWE2      | 0.561                           | 0.061  | 0.403 |  | 0.547                             | 0.047  | 0.289 |  | 0.527                             | 0.027  | 0.218 |  |
|                  |          | WWE3      | 0.540                           | 0.040  | 0.396 |  | 0.536                             | 0.036  | 0.278 |  | 0.527                             | 0.027  | 0.208 |  |
|                  |          | FWE       | 0.507                           | 0.007  | 0.325 |  | 0.518                             | 0.018  | 0.242 |  | 0.517                             | 0.017  | 0.190 |  |
|                  |          | MLE       | 0.517                           | 0.017  | 0.089 |  | 0.513                             | 0.013  | 0.063 |  | 0.510                             | 0.010  | 0.043 |  |
| WWE1(Haar)       | WWE2(D4) | WWE3(LA8) |                                 |        |       |  |                                   |        |       |  |                                   |        |       |  |

Table 15: Monte Carlo 3c (Level 5): d=0.45; MLE, FWE, Haar, D4, LA8

| PARAM            | TRUE     | METHOD    | N=2 <sup>12</sup> (4096); level 5 |        |       | N=2 <sup>13</sup> (8192); level 5 |        |       | N=2 <sup>14</sup> (16384); level 5 |        |       |
|------------------|----------|-----------|-----------------------------------|--------|-------|-----------------------------------|--------|-------|------------------------------------|--------|-------|
|                  |          |           | MEAN                              | BIAS   | RMSE  | MEAN                              | BIAS   | RMSE  | MEAN                               | BIAS   | RMSE  |
| $\hat{d}$        | 0.450    | WWE1      | 0.336                             | -0.114 | 0.209 | 0.354                             | -0.096 | 0.191 | 0.388                              | -0.062 | 0.154 |
|                  |          | WWE2      | 0.337                             | -0.113 | 0.204 | 0.350                             | -0.100 | 0.186 | 0.376                              | -0.074 | 0.163 |
|                  |          | WWE3      | 0.346                             | -0.104 | 0.193 | 0.356                             | -0.094 | 0.180 | 0.377                              | -0.073 | 0.156 |
|                  |          | FWE       | 0.447                             | -0.003 | 0.048 | 0.454                             | 0.004  | 0.034 | 0.456                              | 0.006  | 0.026 |
|                  |          | MLE       | 0.453                             | 0.003  | 0.030 | -                                 | -      | -     | -                                  | -      | -     |
| $\hat{\omega}$   | 0.000    | ALL       | -                                 | -      | -     | -                                 | -      | -     | -                                  | -      | -     |
| $\hat{\alpha}_2$ | 0.500    | WWE1      | 0.331                             | -0.169 | 0.443 | 0.291                             | -0.209 | 0.385 | 0.241                              | -0.259 | 0.349 |
|                  |          | WWE2      | 0.421                             | -0.079 | 0.410 | 0.390                             | -0.110 | 0.344 | 0.359                              | -0.141 | 0.281 |
|                  |          | WWE3      | 0.482                             | -0.018 | 0.363 | 0.474                             | -0.026 | 0.295 | 0.445                              | -0.055 | 0.230 |
|                  |          | FWE       | 0.547                             | 0.047  | 0.307 | 0.537                             | 0.037  | 0.243 | 0.523                              | 0.023  | 0.183 |
|                  |          | MLE       | 0.500                             | 0.000  | 0.089 | -                                 | -      | -     | -                                  | -      | -     |
| $\hat{\beta}_1$  | 0.500    | WWE1      | 0.565                             | 0.065  | 0.210 | 0.559                             | 0.059  | 0.177 | 0.523                              | 0.023  | 0.183 |
|                  |          | WWE2      | 0.582                             | 0.082  | 0.193 | 0.577                             | 0.077  | 0.168 | 0.562                              | 0.062  | 0.144 |
|                  |          | WWE3      | 0.575                             | 0.075  | 0.175 | 0.568                             | 0.068  | 0.155 | 0.556                              | 0.056  | 0.136 |
|                  |          | FWE       | 0.501                             | 0.001  | 0.100 | 0.494                             | -0.006 | 0.072 | 0.491                              | -0.009 | 0.056 |
|                  |          | MLE       | 0.499                             | -0.001 | 0.046 | -                                 | -      | -     | -                                  | -      | -     |
| $\hat{\theta}$   | -0.300   | WWE1      | -0.389                            | -0.089 | 0.153 | -0.414                            | -0.114 | 0.139 | -0.429                             | -0.129 | 0.140 |
|                  |          | WWE2      | -0.305                            | -0.005 | 0.130 | -0.333                            | -0.033 | 0.094 | -0.346                             | -0.046 | 0.072 |
|                  |          | WWE3      | -0.269                            | 0.031  | 0.128 | -0.295                            | 0.005  | 0.084 | -0.309                             | -0.009 | 0.056 |
|                  |          | FWE       | -0.257                            | 0.043  | 0.115 | -0.279                            | 0.021  | 0.071 | -0.288                             | 0.012  | 0.044 |
|                  |          | MLE       | -0.301                            | -0.001 | 0.017 | -                                 | -      | -     | -                                  | -      | -     |
| $\hat{\gamma}$   | 0.500    | WWE1      | 0.483                             | -0.017 | 0.176 | 0.473                             | -0.027 | 0.130 | 0.476                              | -0.024 | 0.097 |
|                  |          | WWE2      | 0.515                             | 0.015  | 0.175 | 0.501                             | 0.001  | 0.127 | 0.501                              | 0.001  | 0.096 |
|                  |          | WWE3      | 0.513                             | 0.013  | 0.166 | 0.505                             | 0.005  | 0.121 | 0.504                              | 0.004  | 0.092 |
|                  |          | FWE       | 0.511                             | 0.011  | 0.156 | 0.504                             | 0.004  | 0.116 | 0.505                              | 0.005  | 0.088 |
|                  |          | MLE       | 0.506                             | 0.006  | 0.028 | -                                 | -      | -     | -                                  | -      | -     |
| WWE1(Haar)       | WWE2(D4) | WWE3(LA8) |                                   |        |       |                                   |        |       |                                    |        |       |

Table 16: Monte Carlo 3d (Level 5): d=0.45; MLE, FWE, Haar, D4, LA8

| PARAM            | TRUE     | METHOD    | N=2 <sup>9</sup> (512); level 6 |        |       | N=2 <sup>10</sup> (1024); level 6 |        |       | N=2 <sup>11</sup> (2048); level 6 |        |       |
|------------------|----------|-----------|---------------------------------|--------|-------|-----------------------------------|--------|-------|-----------------------------------|--------|-------|
|                  |          |           | MEAN                            | BIAS   | RMSE  | MEAN                              | BIAS   | RMSE  | MEAN                              | BIAS   | RMSE  |
| $\hat{d}$        | 0.450    | WWE1      | 0.259                           | -0.191 | 0.314 | 0.278                             | -0.172 | 0.288 | 0.314                             | -0.136 | 0.251 |
|                  |          | WWE2      | 0.271                           | -0.179 | 0.297 | 0.300                             | -0.150 | 0.257 | 0.307                             | -0.143 | 0.249 |
|                  |          | WWE3      | 0.291                           | -0.159 | 0.282 | 0.291                             | -0.159 | 0.267 | 0.307                             | -0.143 | 0.250 |
|                  |          | FWE       | 0.302                           | -0.148 | 0.269 | 0.381                             | -0.069 | 0.172 | 0.421                             | -0.029 | 0.107 |
|                  |          | MLE       | 0.377                           | -0.073 | 0.164 | 0.426                             | -0.024 | 0.083 | 0.445                             | -0.005 | 0.043 |
| $\hat{\omega}$   | 0.000    | ALL       | -                               | -      | -     | -                                 | -      | -     | -                                 | -      | -     |
| $\hat{\alpha}_2$ | 0.500    | WWE1      | 0.341                           | -0.159 | 0.599 | 0.358                             | -0.142 | 0.562 | 0.330                             | -0.170 | 0.507 |
|                  |          | WWE2      | 0.412                           | -0.088 | 0.581 | 0.409                             | -0.091 | 0.557 | 0.474                             | -0.026 | 0.468 |
|                  |          | WWE3      | 0.433                           | -0.067 | 0.574 | 0.486                             | -0.014 | 0.495 | 0.506                             | 0.006  | 0.442 |
|                  |          | FWE       | 0.510                           | 0.010  | 0.498 | 0.532                             | 0.032  | 0.425 | 0.551                             | 0.051  | 0.380 |
|                  |          | MLE       | 0.533                           | 0.033  | 0.259 | 0.508                             | 0.008  | 0.182 | 0.505                             | 0.005  | 0.128 |
| $\hat{\beta}_1$  | 0.500    | WWE1      | 0.632                           | 0.132  | 0.318 | 0.608                             | 0.108  | 0.288 | 0.590                             | 0.090  | 0.244 |
|                  |          | WWE2      | 0.624                           | 0.124  | 0.306 | 0.623                             | 0.123  | 0.261 | 0.601                             | 0.101  | 0.233 |
|                  |          | WWE3      | 0.625                           | 0.125  | 0.289 | 0.617                             | 0.117  | 0.254 | 0.609                             | 0.109  | 0.223 |
|                  |          | FWE       | 0.612                           | 0.112  | 0.275 | 0.561                             | 0.061  | 0.203 | 0.528                             | 0.028  | 0.148 |
|                  |          | MLE       | 0.564                           | 0.064  | 0.166 | 0.525                             | 0.025  | 0.102 | 0.507                             | 0.007  | 0.064 |
| $\hat{\theta}$   | -0.300   | WWE1      | -0.297                          | 0.003  | 0.277 | -0.352                            | -0.052 | 0.233 | -0.382                            | -0.082 | 0.192 |
|                  |          | WWE2      | -0.238                          | 0.062  | 0.277 | -0.278                            | 0.022  | 0.224 | -0.288                            | 0.012  | 0.166 |
|                  |          | WWE3      | -0.217                          | 0.083  | 0.268 | -0.248                            | 0.052  | 0.208 | -0.260                            | 0.040  | 0.161 |
|                  |          | FWE       | -0.212                          | 0.088  | 0.247 | -0.238                            | 0.062  | 0.186 | -0.248                            | 0.052  | 0.145 |
|                  |          | MLE       | -0.303                          | -0.003 | 0.049 | -0.304                            | -0.004 | 0.035 | -0.301                            | -0.001 | 0.024 |
| $\hat{\gamma}$   | 0.500    | WWE1      | 0.518                           | 0.018  | 0.370 | 0.510                             | 0.010  | 0.279 | 0.490                             | -0.010 | 0.226 |
|                  |          | WWE2      | 0.561                           | 0.061  | 0.337 | 0.541                             | 0.041  | 0.265 | 0.514                             | 0.014  | 0.217 |
|                  |          | WWE3      | 0.549                           | 0.049  | 0.337 | 0.526                             | 0.026  | 0.252 | 0.514                             | 0.014  | 0.203 |
|                  |          | FWE       | 0.539                           | 0.039  | 0.309 | 0.518                             | 0.018  | 0.236 | 0.511                             | 0.011  | 0.190 |
|                  |          | MLE       | 0.509                           | 0.009  | 0.091 | 0.513                             | 0.013  | 0.064 | 0.508                             | 0.008  | 0.042 |
| WWE1(Haar)       | WWE2(D4) | WWE3(LA8) |                                 |        |       |                                   |        |       |                                   |        |       |

Table 17: Monte Carlo 3e (Level 6): d=0.45; MLE, FWE, Haar, D4, LA8

| PARAM            | TRUE     | METHOD    | N=2 <sup>12</sup> (4096); level 6 |        |       | N=2 <sup>13</sup> (8192); level 6 |        |       | N=2 <sup>14</sup> (16384); level 6 |        |       |
|------------------|----------|-----------|-----------------------------------|--------|-------|-----------------------------------|--------|-------|------------------------------------|--------|-------|
|                  |          |           | MEAN                              | BIAS   | RMSE  | MEAN                              | BIAS   | RMSE  | MEAN                               | BIAS   | RMSE  |
| $\hat{d}$        | 0.450    | WWE1      | 0.348                             | -0.102 | 0.222 | 0.373                             | -0.077 | 0.191 | 0.422                              | -0.028 | 0.119 |
|                  |          | WWE2      | 0.341                             | -0.109 | 0.219 | 0.378                             | -0.072 | 0.178 | 0.417                              | -0.033 | 0.124 |
|                  |          | WWE3      | 0.334                             | -0.116 | 0.228 | 0.383                             | -0.067 | 0.166 | 0.410                              | -0.040 | 0.123 |
|                  |          | FWE       | 0.446                             | -0.004 | 0.048 | 0.453                             | 0.003  | 0.035 | 0.456                              | 0.006  | 0.027 |
|                  |          | MLE       | 0.452                             | 0.002  | 0.029 | -                                 | -      | -     | -                                  | -      | -     |
| $\hat{\omega}$   | 0.000    | ALL       | -                                 | -      | -     | -                                 | -      | -     | -                                  | -      | -     |
| $\hat{\alpha}_2$ | 0.500    | WWE1      | 0.311                             | -0.189 | 0.444 | 0.268                             | -0.232 | 0.394 | 0.224                              | -0.276 | 0.361 |
|                  |          | WWE2      | 0.422                             | -0.078 | 0.398 | 0.379                             | -0.121 | 0.351 | 0.354                              | -0.146 | 0.288 |
|                  |          | WWE3      | 0.491                             | -0.009 | 0.355 | 0.465                             | -0.035 | 0.301 | 0.425                              | -0.075 | 0.238 |
|                  |          | FWE       | 0.544                             | 0.044  | 0.301 | 0.530                             | 0.030  | 0.249 | 0.526                              | 0.026  | 0.184 |
|                  |          | MLE       | 0.498                             | -0.002 | 0.093 | -                                 | -      | -     | -                                  | -      | -     |
| $\hat{\beta}_1$  | 0.500    | WWE1      | 0.569                             | 0.069  | 0.207 | 0.553                             | 0.053  | 0.172 | 0.522                              | 0.022  | 0.125 |
|                  |          | WWE2      | 0.582                             | 0.082  | 0.201 | 0.561                             | 0.061  | 0.164 | 0.532                              | 0.032  | 0.121 |
|                  |          | WWE3      | 0.587                             | 0.087  | 0.196 | 0.553                             | 0.053  | 0.152 | 0.540                              | 0.040  | 0.120 |
|                  |          | FWE       | 0.505                             | 0.005  | 0.100 | 0.497                             | -0.003 | 0.076 | 0.492                              | -0.008 | 0.058 |
|                  |          | MLE       | 0.500                             | -0.000 | 0.048 | -                                 | -      | -     | -                                  | -      | -     |
| $\hat{\theta}$   | -0.300   | WWE1      | -0.402                            | -0.102 | 0.152 | -0.420                            | -0.120 | 0.142 | -0.435                             | -0.135 | 0.144 |
|                  |          | WWE2      | -0.319                            | -0.019 | 0.119 | -0.338                            | -0.038 | 0.089 | -0.353                             | -0.053 | 0.075 |
|                  |          | WWE3      | -0.282                            | 0.018  | 0.118 | -0.300                            | 0.000  | 0.079 | -0.318                             | -0.018 | 0.053 |
|                  |          | FWE       | -0.264                            | 0.036  | 0.104 | -0.276                            | 0.024  | 0.076 | -0.289                             | 0.011  | 0.045 |
|                  |          | MLE       | -0.302                            | -0.002 | 0.017 | -                                 | -      | -     | -                                  | -      | -     |
| $\hat{\gamma}$   | 0.500    | WWE1      | 0.482                             | -0.018 | 0.169 | 0.483                             | -0.017 | 0.131 | 0.475                              | -0.025 | 0.095 |
|                  |          | WWE2      | 0.510                             | 0.010  | 0.164 | 0.507                             | 0.007  | 0.133 | 0.501                              | 0.001  | 0.094 |
|                  |          | WWE3      | 0.511                             | 0.011  | 0.155 | 0.511                             | 0.011  | 0.127 | 0.503                              | 0.003  | 0.090 |
|                  |          | FWE       | 0.507                             | 0.007  | 0.148 | 0.509                             | 0.009  | 0.119 | 0.502                              | 0.002  | 0.085 |
|                  |          | MLE       | 0.506                             | 0.006  | 0.031 | -                                 | -      | -     | -                                  | -      | -     |
| WWE1(Haar)       | WWE2(D4) | WWE3(LA8) |                                   |        |       |                                   |        |       |                                    |        |       |

Table 18: Monte Carlo 3f (Level 6): d=0.45; MLE, FWE, Haar, D4, LA8

## 7 Convergence analysis II

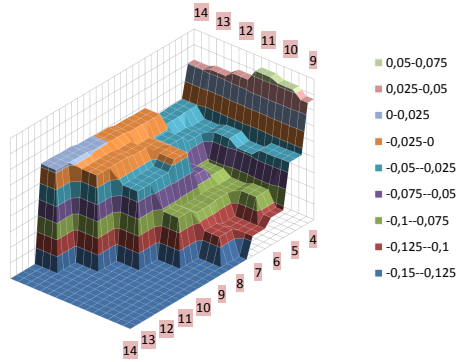

(a) Bias of  $\hat{d}$  (D4, d=0.25)

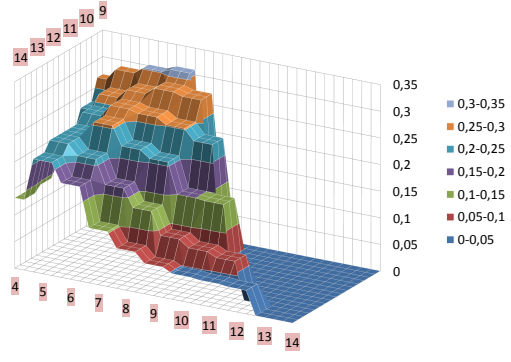

(b) RMSE of  $\hat{d}$  (D4, d=0.25)

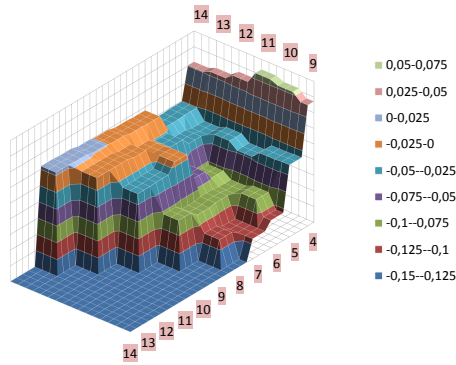

(c) Bias of  $\hat{\alpha}$  (D4, d=0.25)

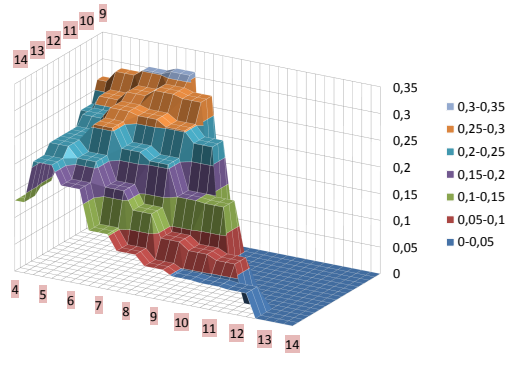

(d) RMSE of  $\hat{\alpha}$  (D4, d=0.25)

Figure 7: 3D Plots: Partial decomposition:  $\hat{d}$ ,  $\hat{\alpha}$ : Bias, RMSE



## **8   Relative Performance**

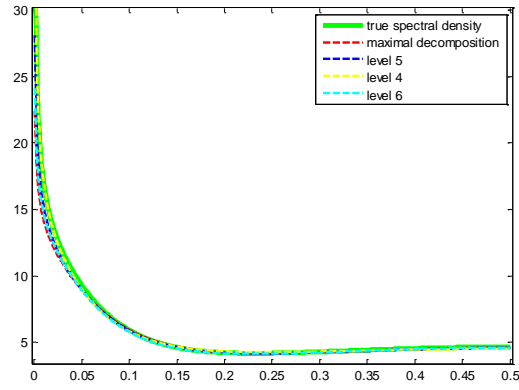

(a)  $T=512$  ( $2^9$ ), level= max(9), 4(Haar),5(D4),6(LA8)

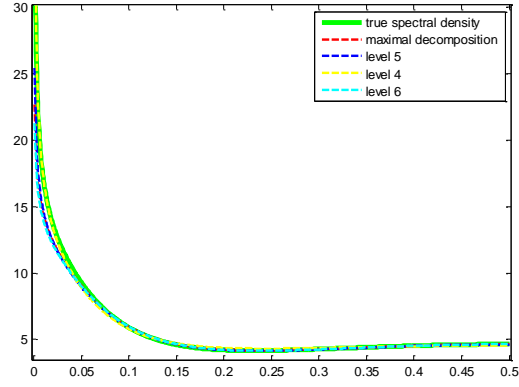

(b)  $T=2048$  ( $2^{11}$ ), level= max(11)(LA8), 4(Haar), 5(D4), 6(D4)

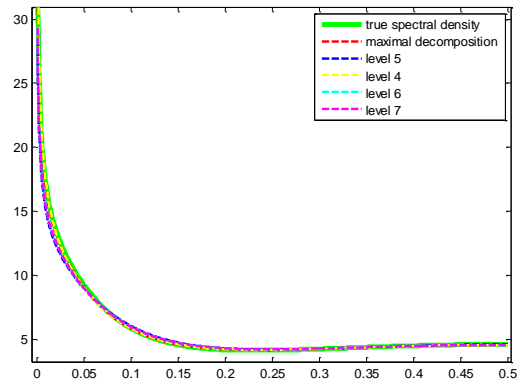

(c)  $T=16384$  ( $2^{14}$ ), level= max(14)(LA8), 4(LA8), 5(D4), 6(LA8), 7(LA8)

Figure 8: Spectral density estimation: Partial decomposition 0.25

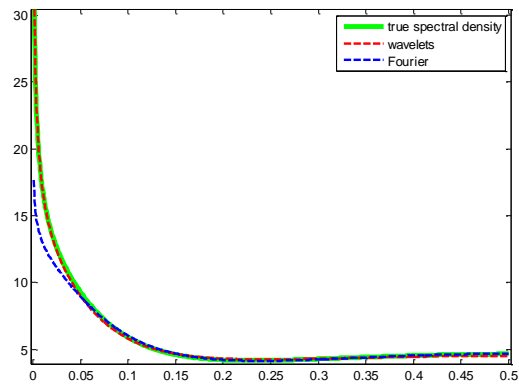

(a)  $T=512$  ( $2^9$ ), level= 4(Haar)

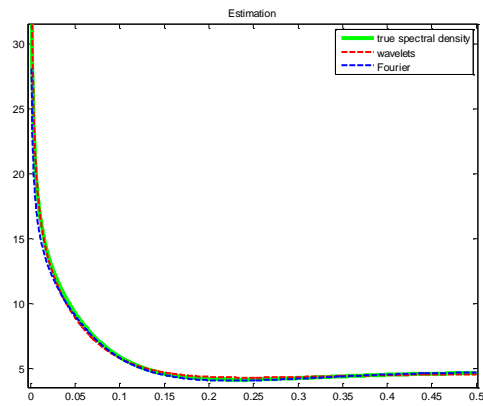

(b)  $T=2048$  ( $2^{11}$ ), level= 4(Haar)

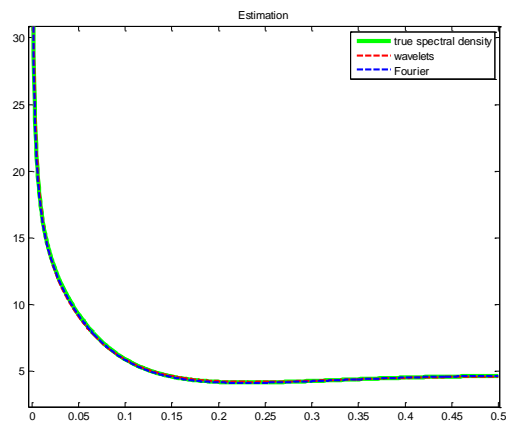

(c)  $T=16384$  ( $2^{14}$ ), level=4(Haar)

Figure 9: Spectral density estimation: Wavelets (Level 4) vs Fourier

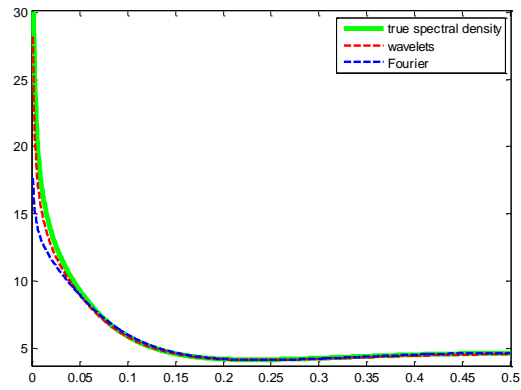

(a)  $T=512$  ( $2^9$ ), level=5(D4)

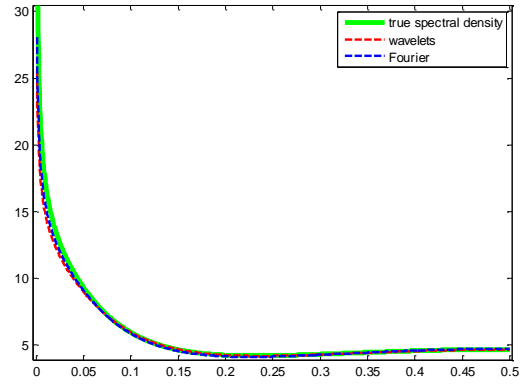

(b)  $T=2048$  ( $2^{11}$ ), level=5(D4)

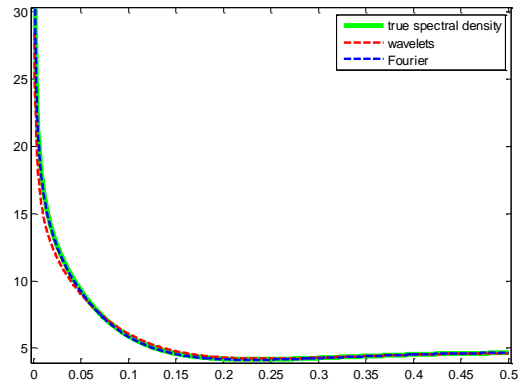

(c)  $T=16384$  ( $2^{14}$ ), level=5(D4)

Figure 10: Spectral density estimation: Wavelets (Level 5) vs Fourier

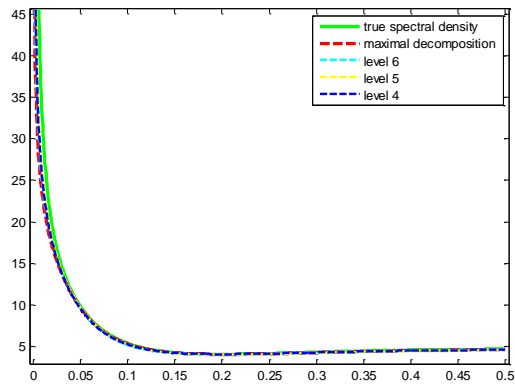

(a)  $T=512$  ( $2^9$ ), level= max(9)(LA8), 4(Haar), 5(D4), 6(LA8)

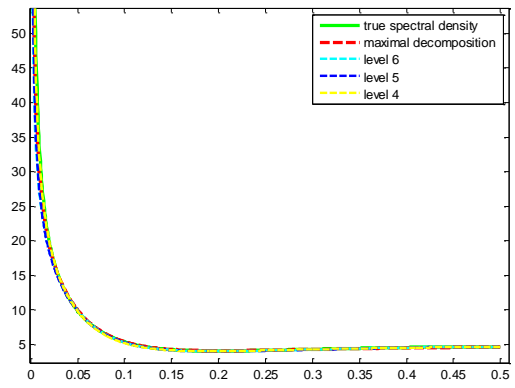

(b)  $T=2048$  ( $2^{11}$ ), level= max(11)(D4), 4(Haar), 5(D4), 6(D4)

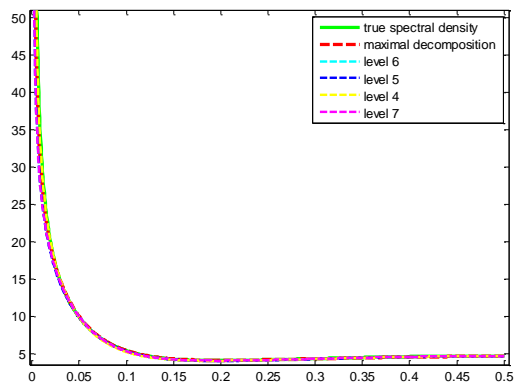

(c)  $T=16384$  ( $2^{14}$ ), level= max(14)(LA8), 4(LA8), 5(D4), 6(LA8), 7(LA8)

Figure 11: Spectral density estimation: Partial decomposition 0.45

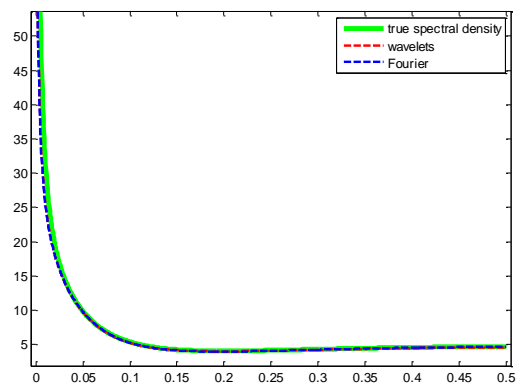

(a)  $T=512$  ( $2^9$ ), level= 4(Haar)

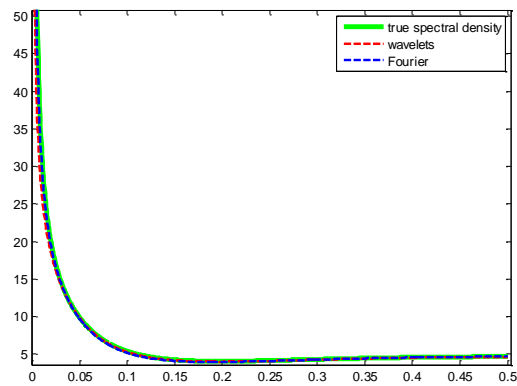

(b)  $T=2048$  ( $2^{11}$ ), level= 5(D4)

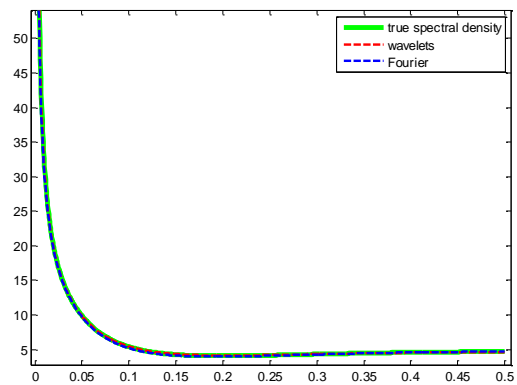

(c)  $T=16384$  ( $2^{14}$ ), level= 7(LA8)

Figure 12: Spectral density estimation: Wavelets vs Fourier
